# Supplementary material for: Hydroxycitric acid inhibits ferroptosis and ameliorates benign prostatic hyperplasia by upregulating the Nrf2/GPX4 pathway
Source: Research Square preprint supplement (doi:10.21203/rs.3.rs-5422680/v1), 2024-12-02
Supplement: Supplementary file 1 [file 08e675f39c5d86a7b88d64d3.docx]

# Full unedited gel/blot for Figure 2A

GPx4

1 2 3 4 5 6


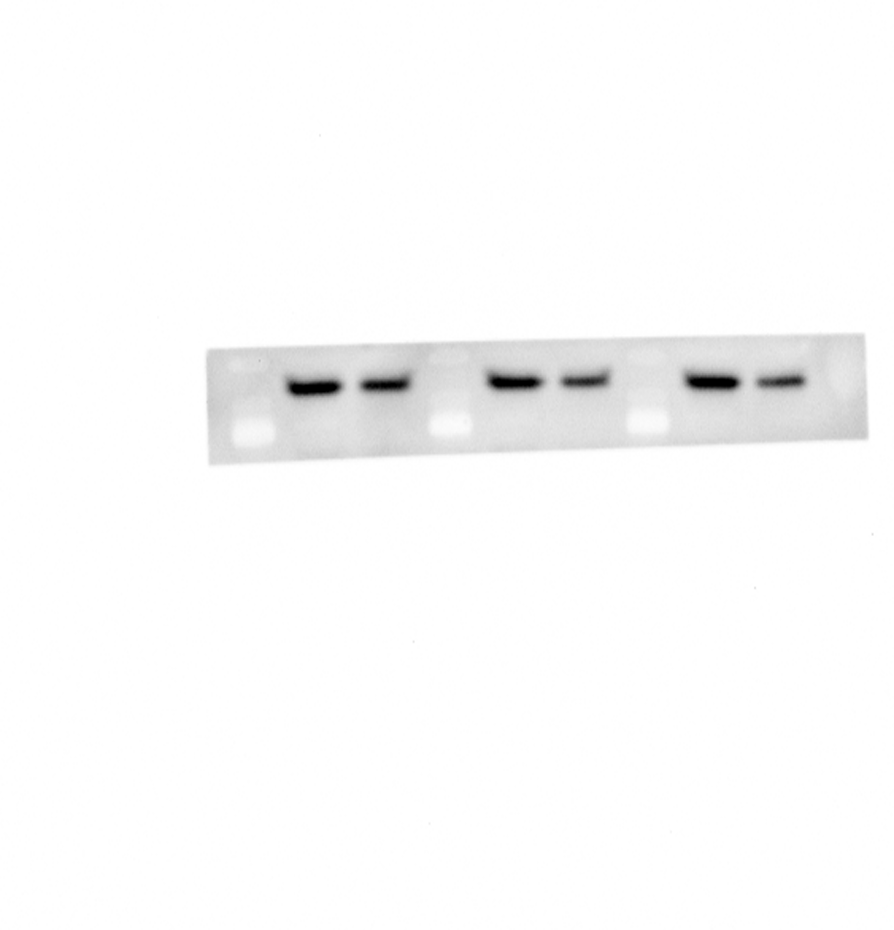


25 kDa

15 kDa

1,3,5 = Sham 2,4,6 = BPH

GAPDH

1 2 3 4 5 6


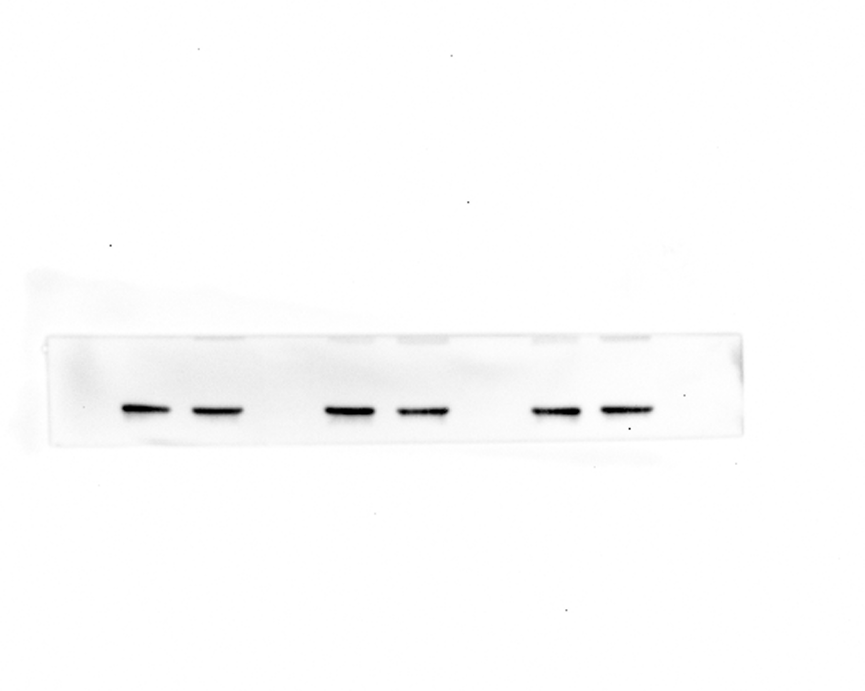


50 kDa

27 kDa

1,3,5 = Sham 2,4,6 = BPH

# Full unedited gel/blot for Figure 2F

GPx4

1 2 3 4 5 6 7 8 9


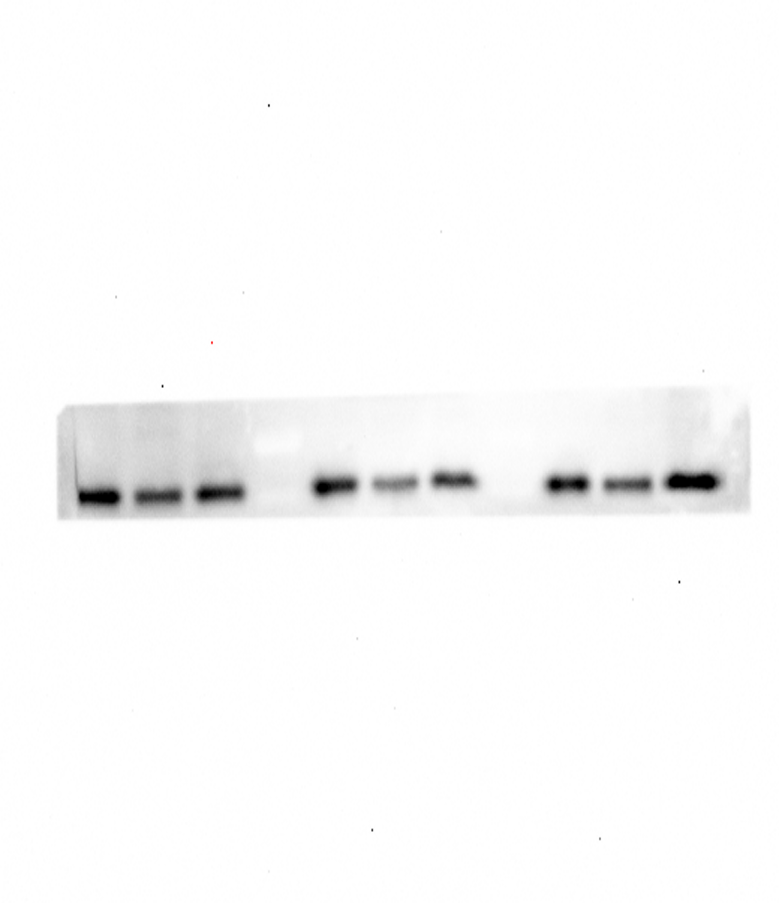


25 kDa

15 kDa

1,4,7 = Sham 2,5,8 = BPH 3,6,9 = BPH+Lip-1

GAPDH

1 2 3 4 5 6 7 8 9


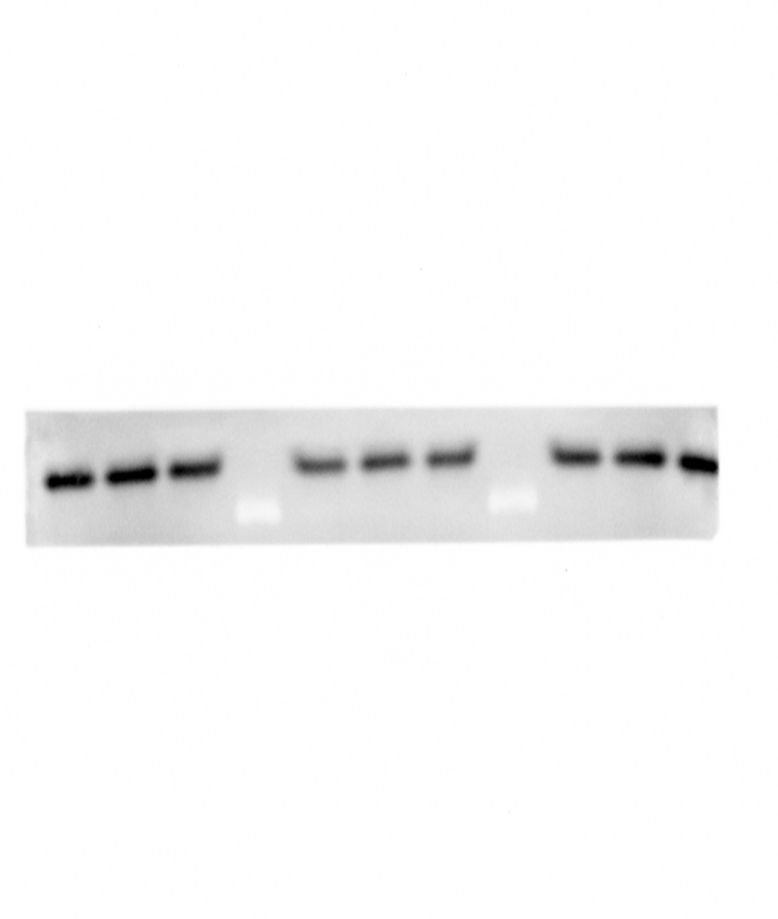


50 kDa

27 kDa

1,4,7 = Sham 2,5,8 = BPH 3,6,9 = BPH+Lip-1

# Full unedited gel/blot for Figure 4D

Nrf2

1 2 3 4 5 6 7 8 9 10


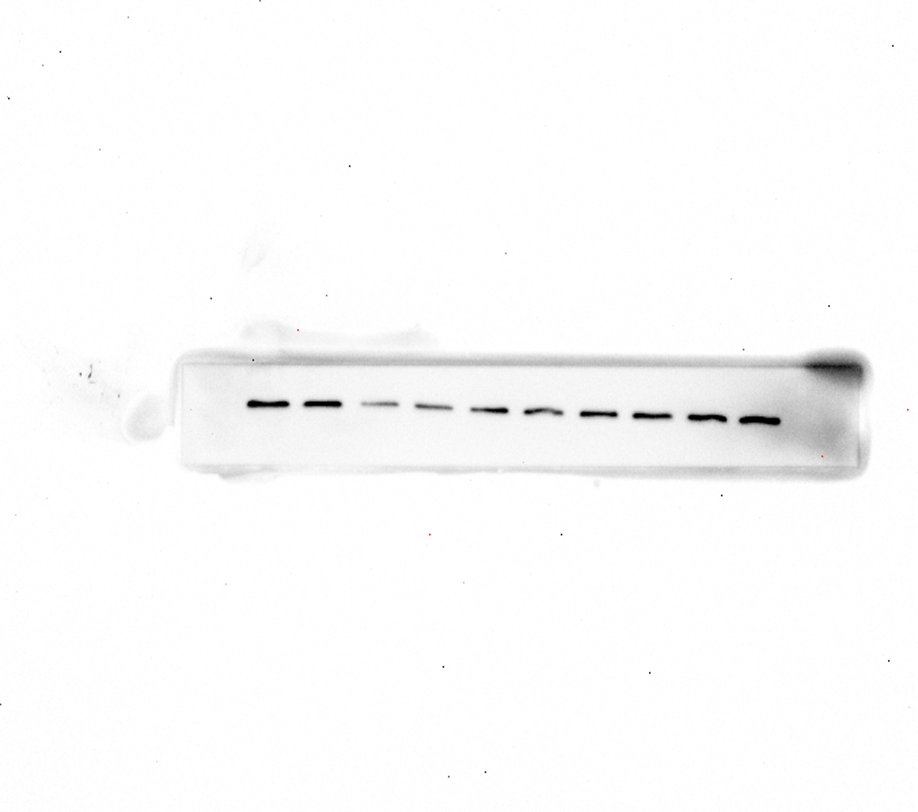


150 kDa

100 kDa

70 kDa

Nrf2

1 2 3 4 5 6 7 8 9 10


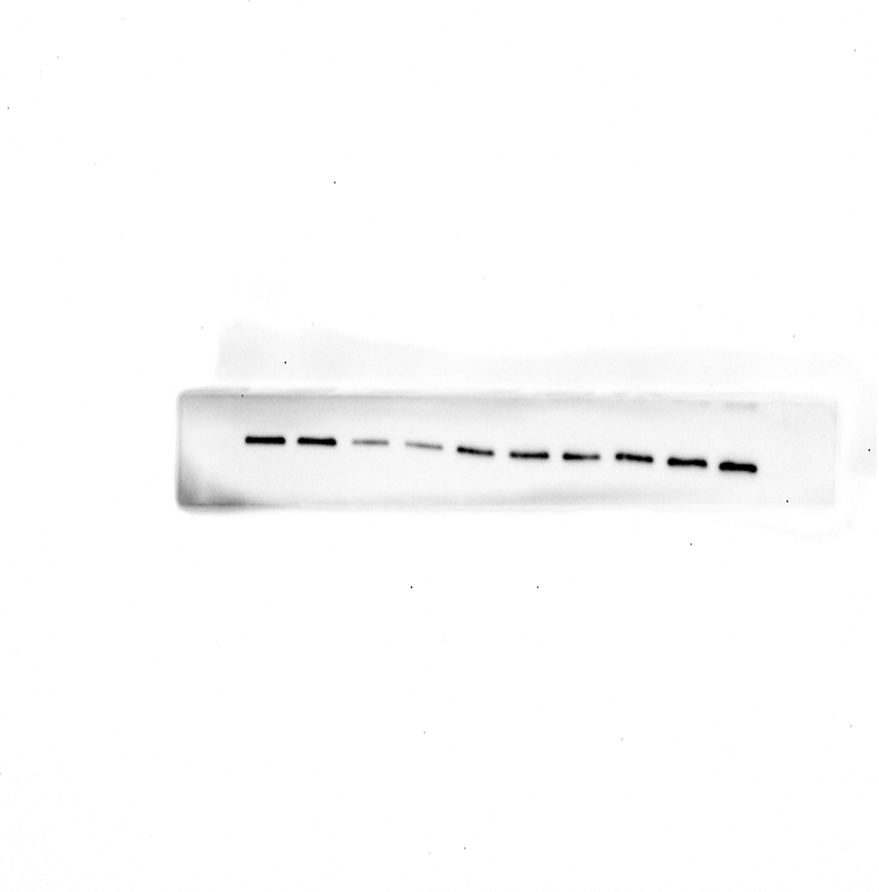


150 kDa

100 kDa

70 kDa

1,2 = Sham 3,4 = BPH+Bru 5,6 = BPH 7,8 = BPH+Bru+HCA 9,10 = BPH+HCA

GPx4

1 2 3 4 5 6 7 8 9 10


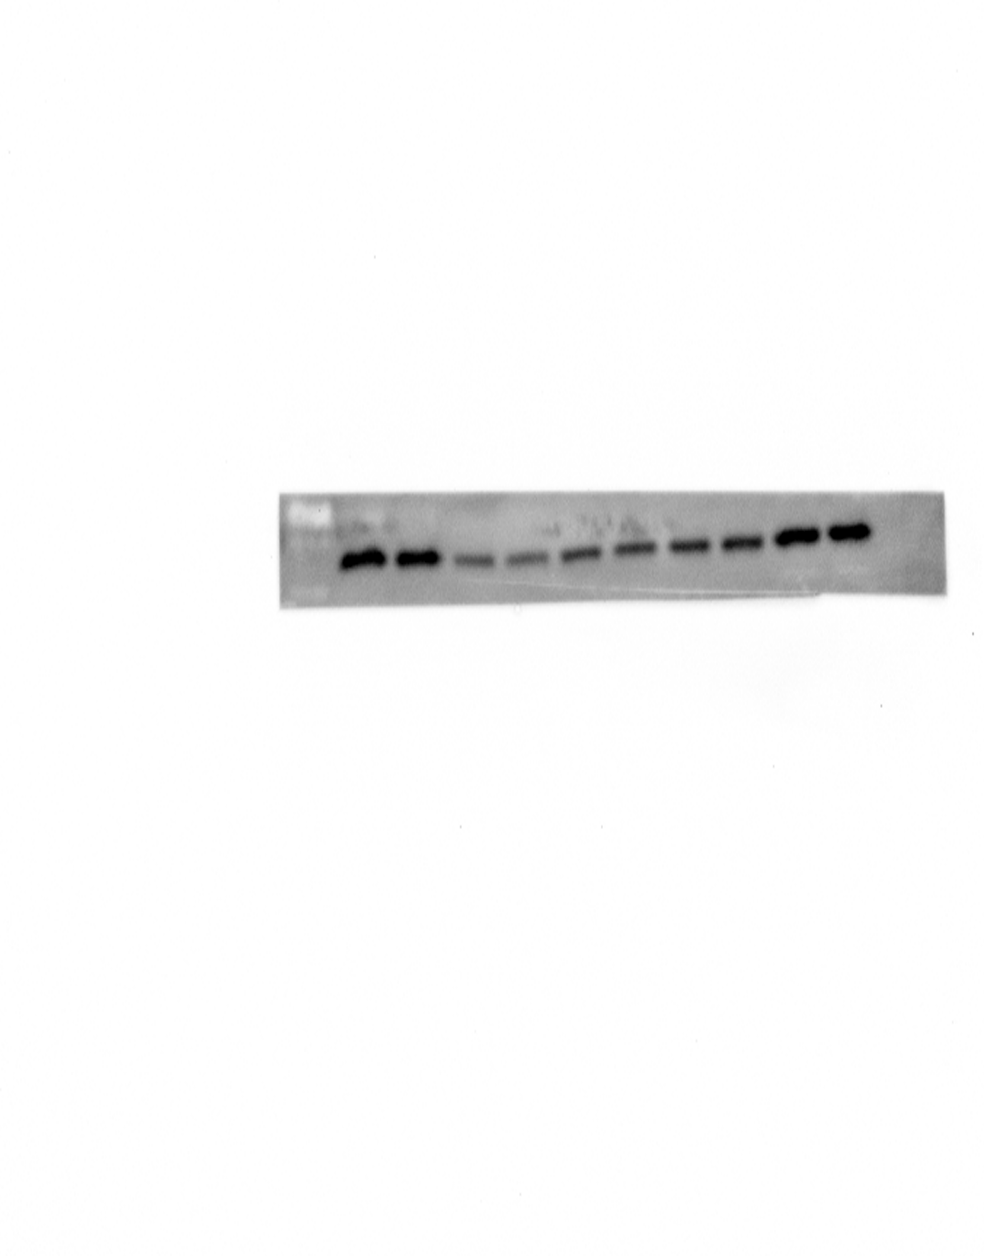


25 kDa

15 kDa

GPx4

1 2 3 4 5 6 7 8 9 10


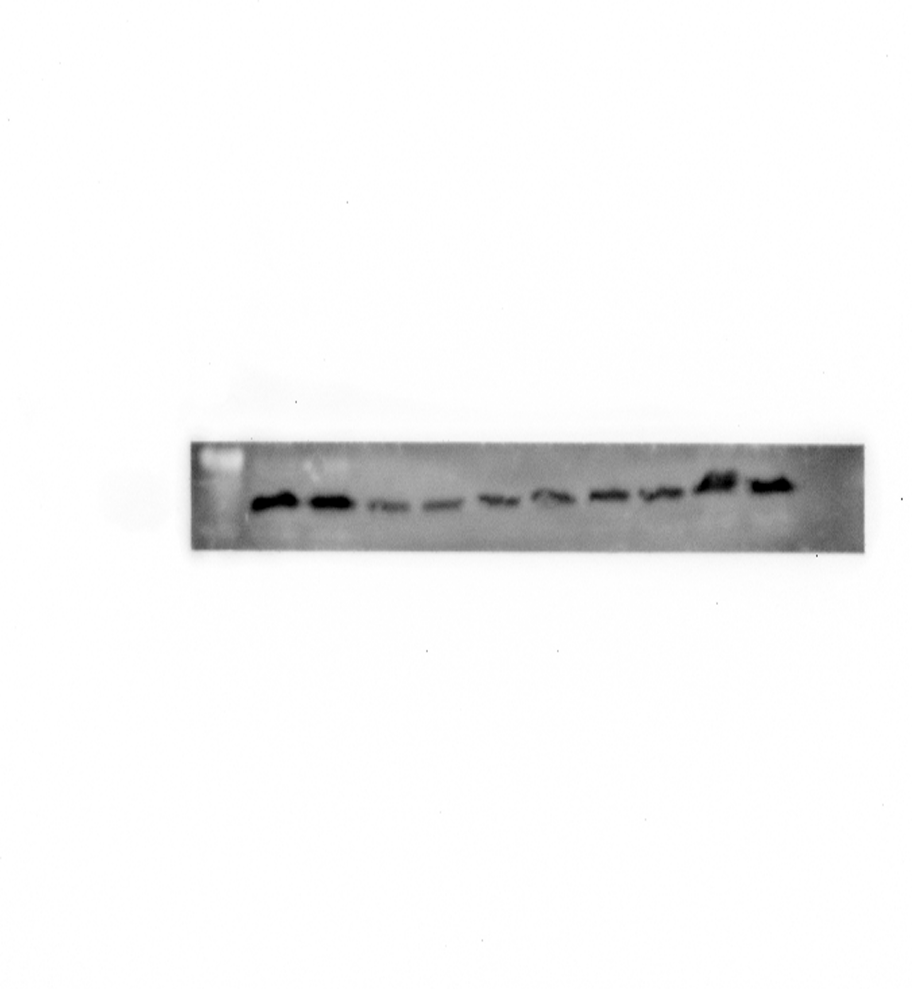


25 kDa

15 kDa

1,2 = Sham 3,4 = BPH+Bru 5,6 = BPH 7,8 = BPH+Bru+HCA 9,10 = BPH+HCA

GAPDH

1 2 3 4 5 6 7 8 9 10


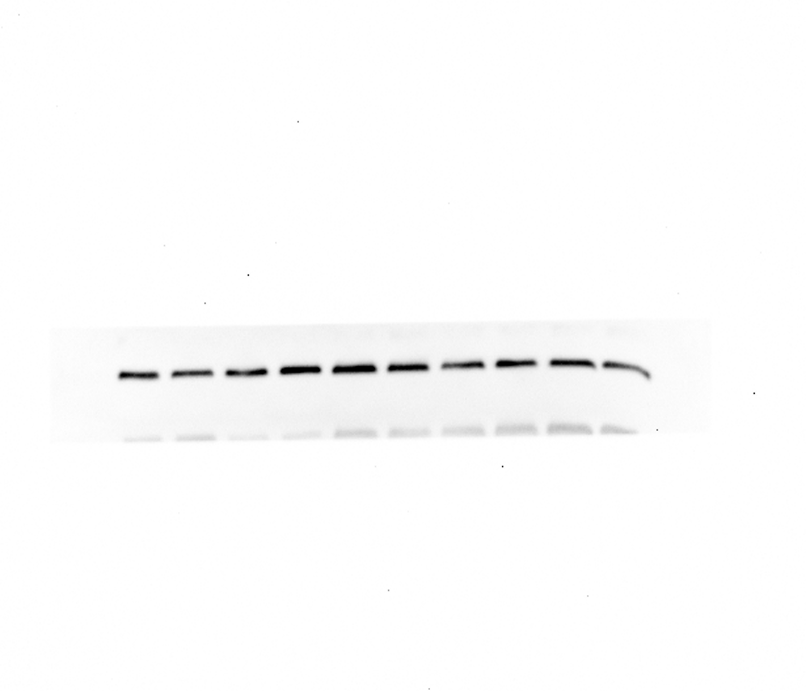


50 kDa

27 kDa

GAPDH

1 2 3 4 5 6 7 8 9 10


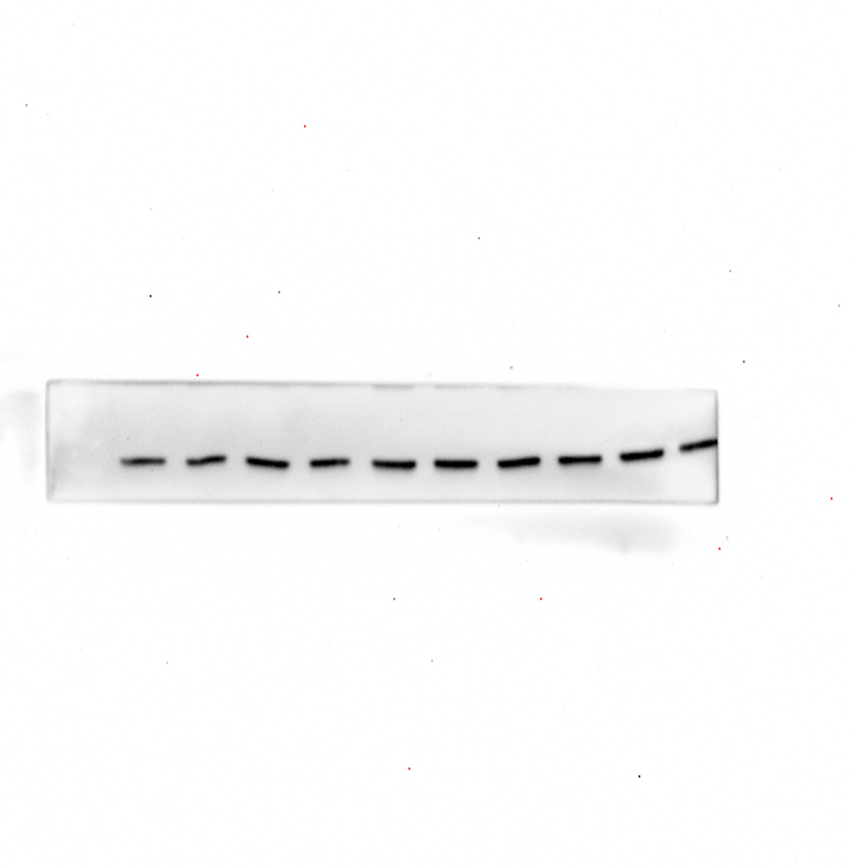


50 kDa

27 kDa

1,2 = Sham 3,4 = BPH+Bru 5,6 = BPH 7,8 = BPH+Bru+HCA 9,10 = BPH+HCA
