# Supplementary material for: Hydroxycitric acid inhibits ferroptosis and ameliorates benign prostatic hyperplasia by upregulating the Nrf2/GPX4 pathway
Source: Research Square preprint supplement (doi:10.21203/rs.3.rs-5422680/v1), 2024-12-02
Supplement: Supplementary file 2 [file 330032cbbda3f8e4b379bb48.docx]

**The following shows images of prostate tissue from different groups.**

| 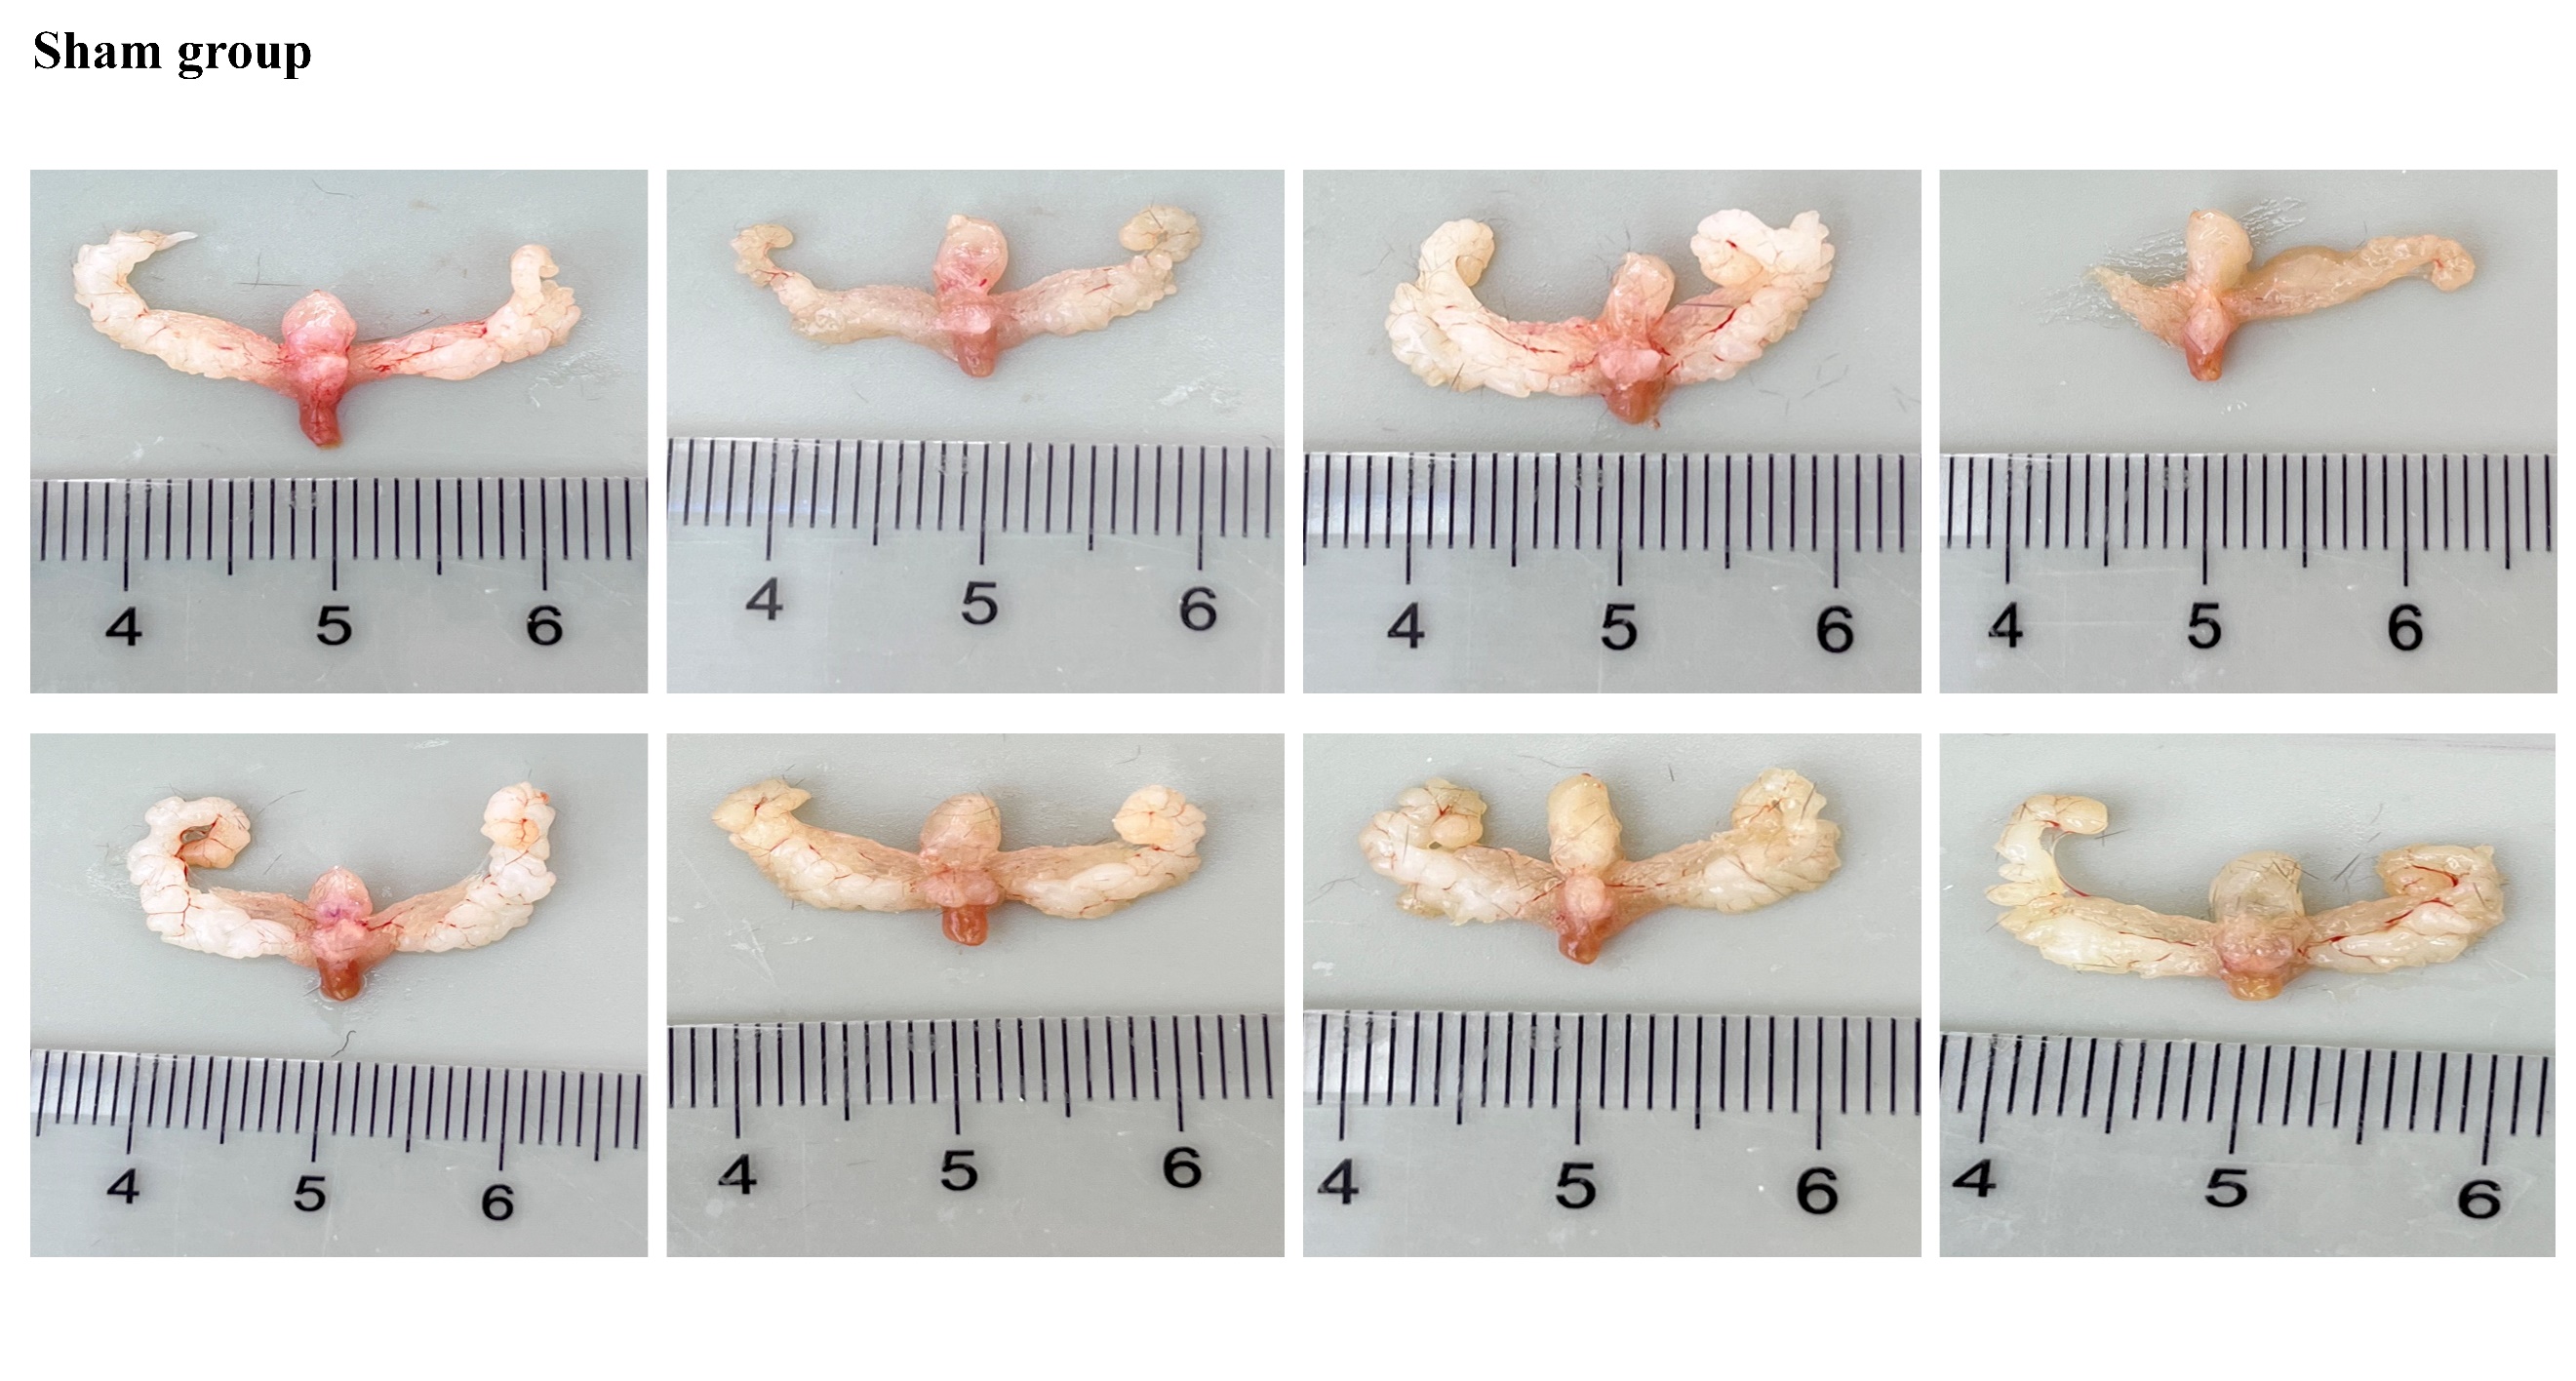 |
| --- |
| 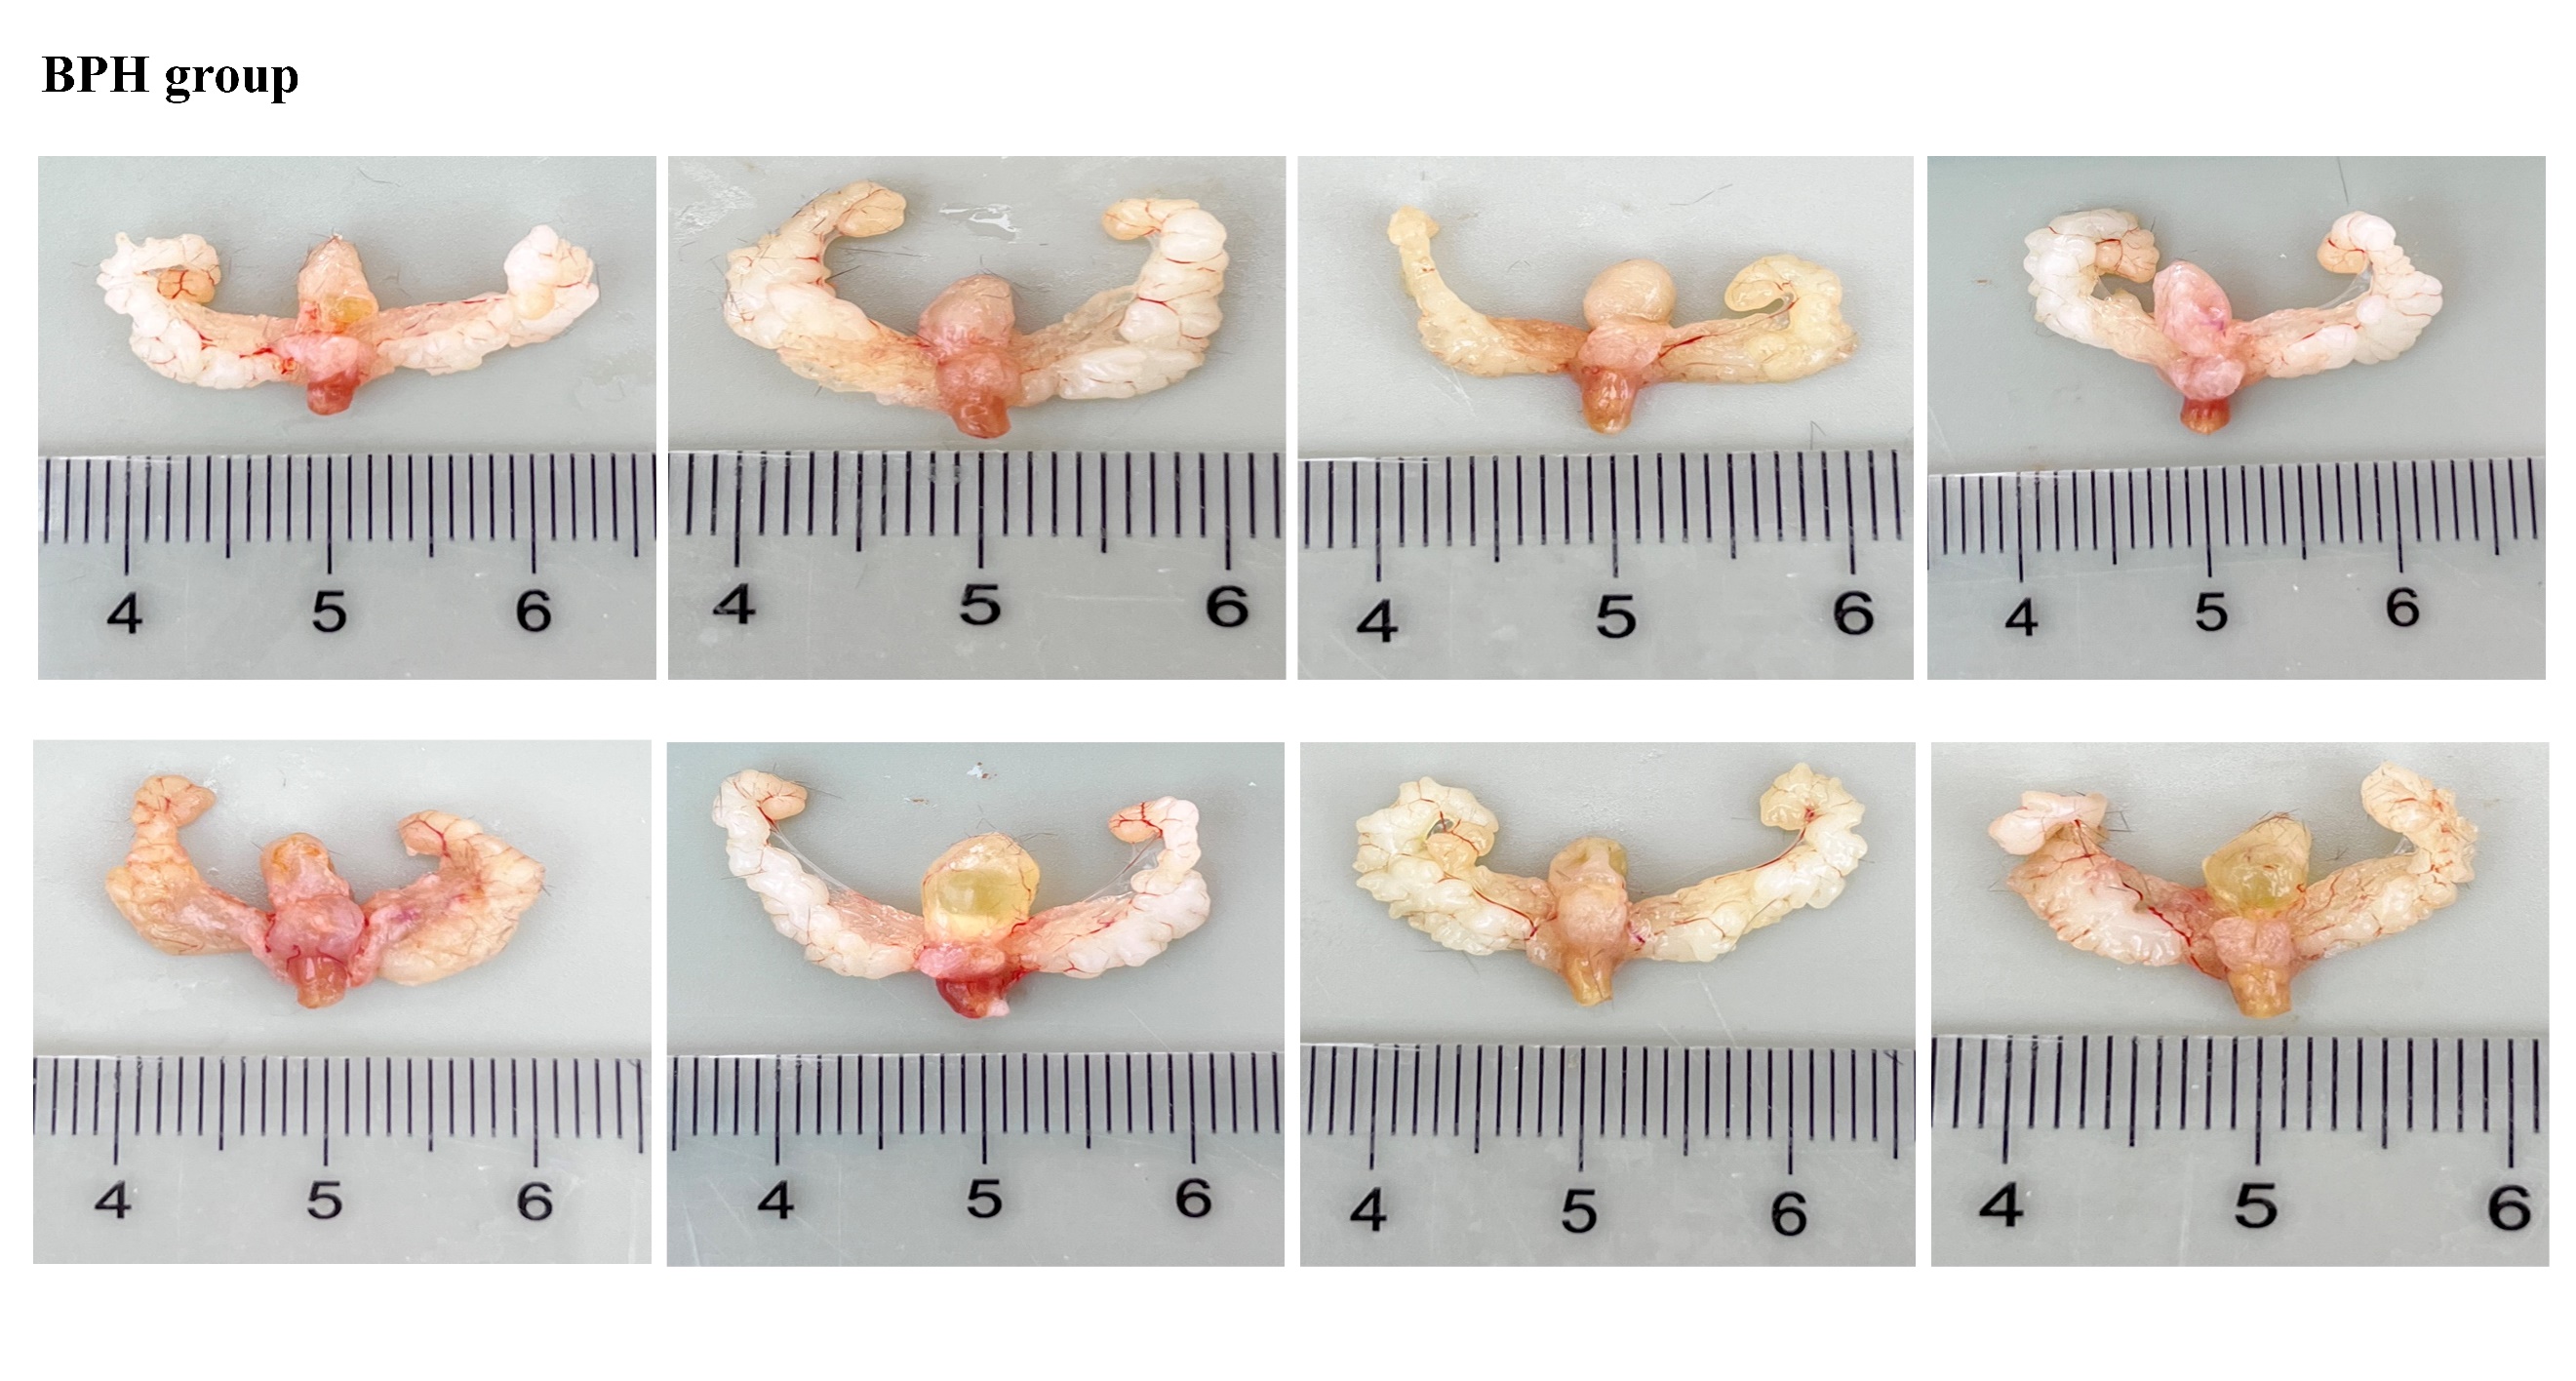 |
| 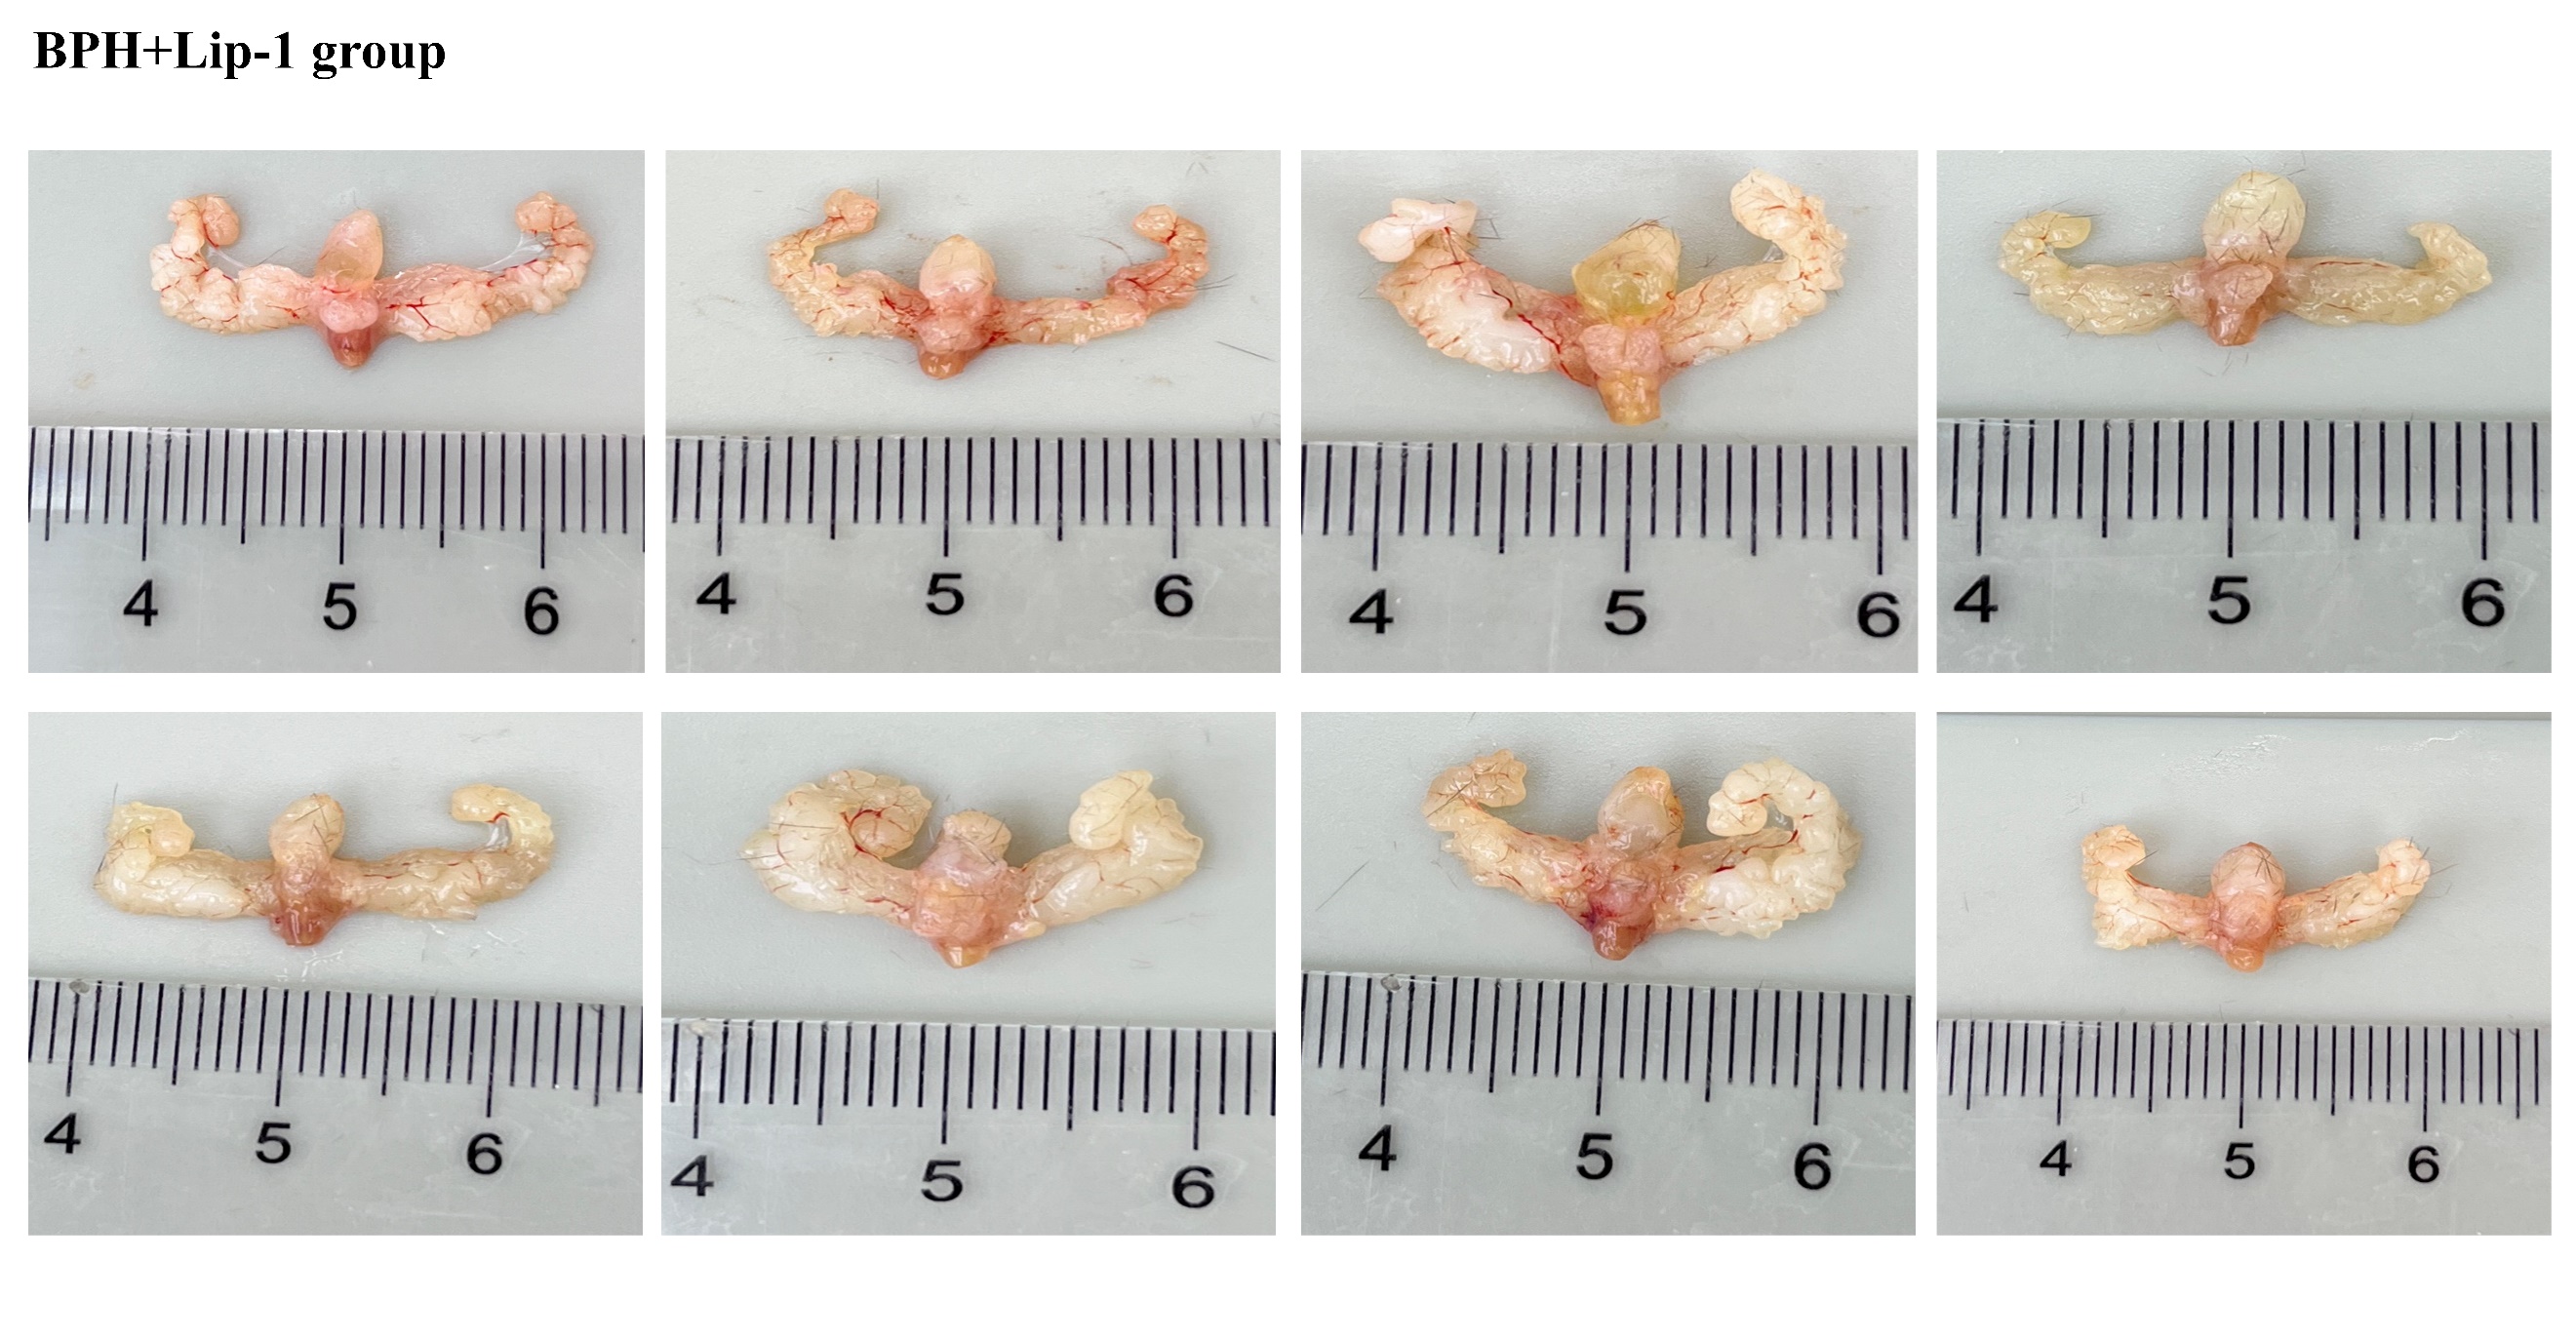 |
| 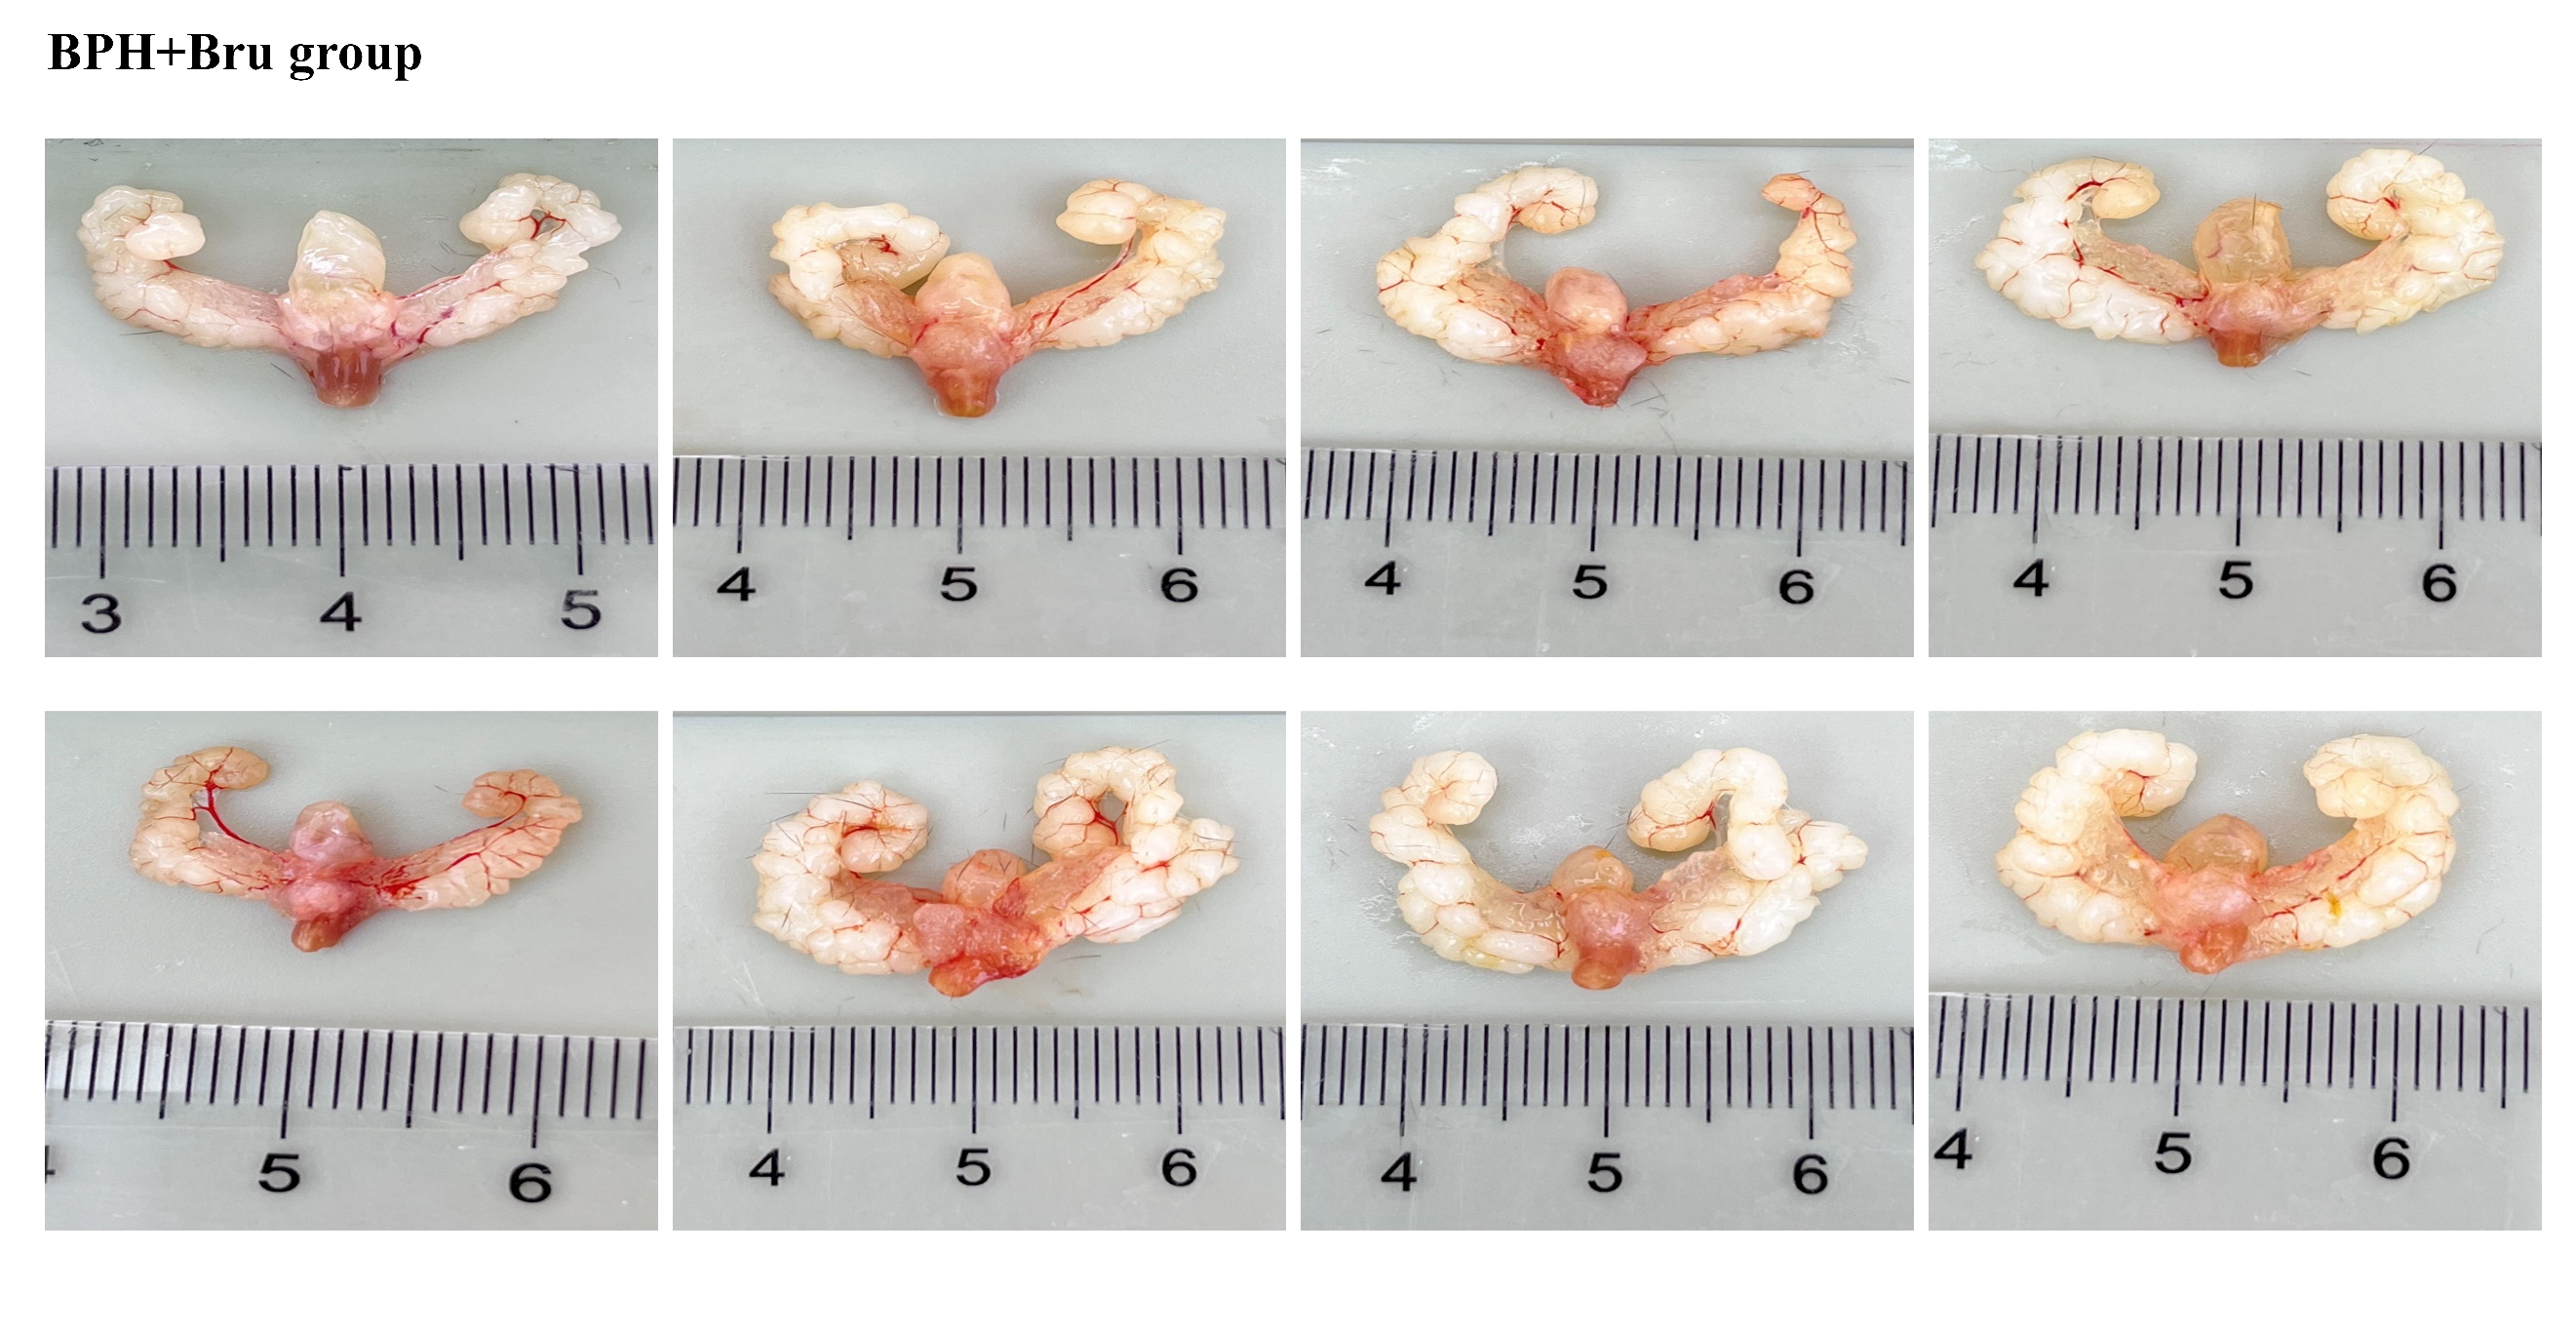 |
| 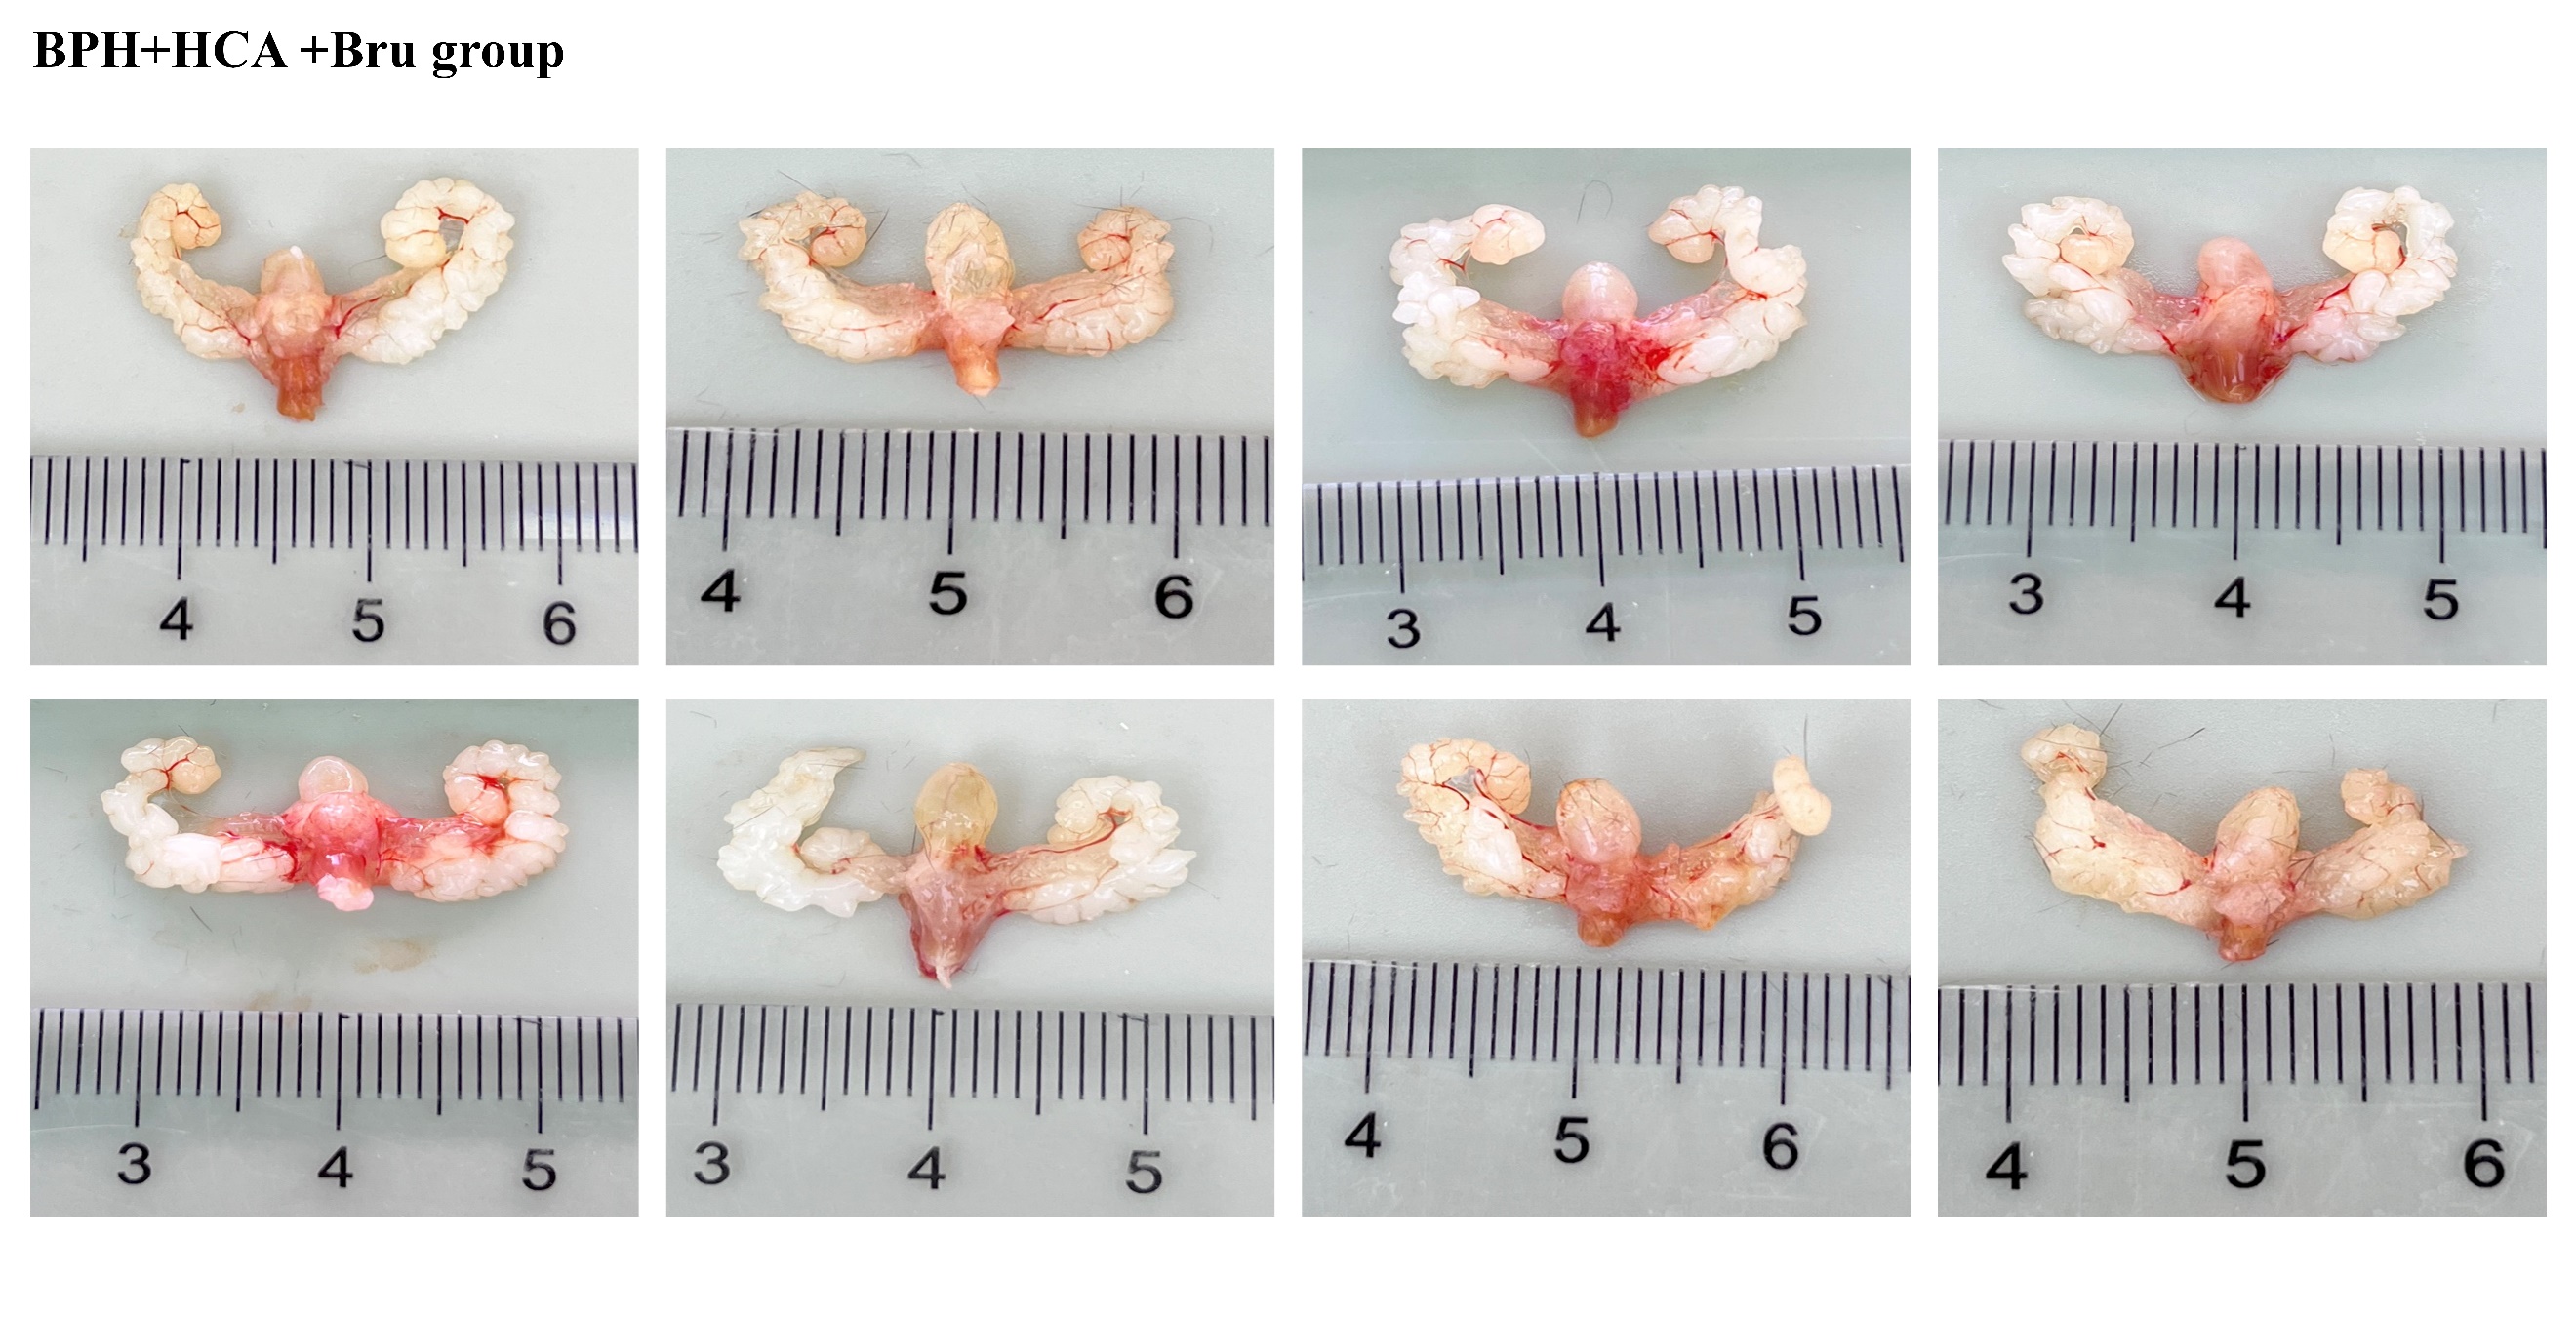 |
| 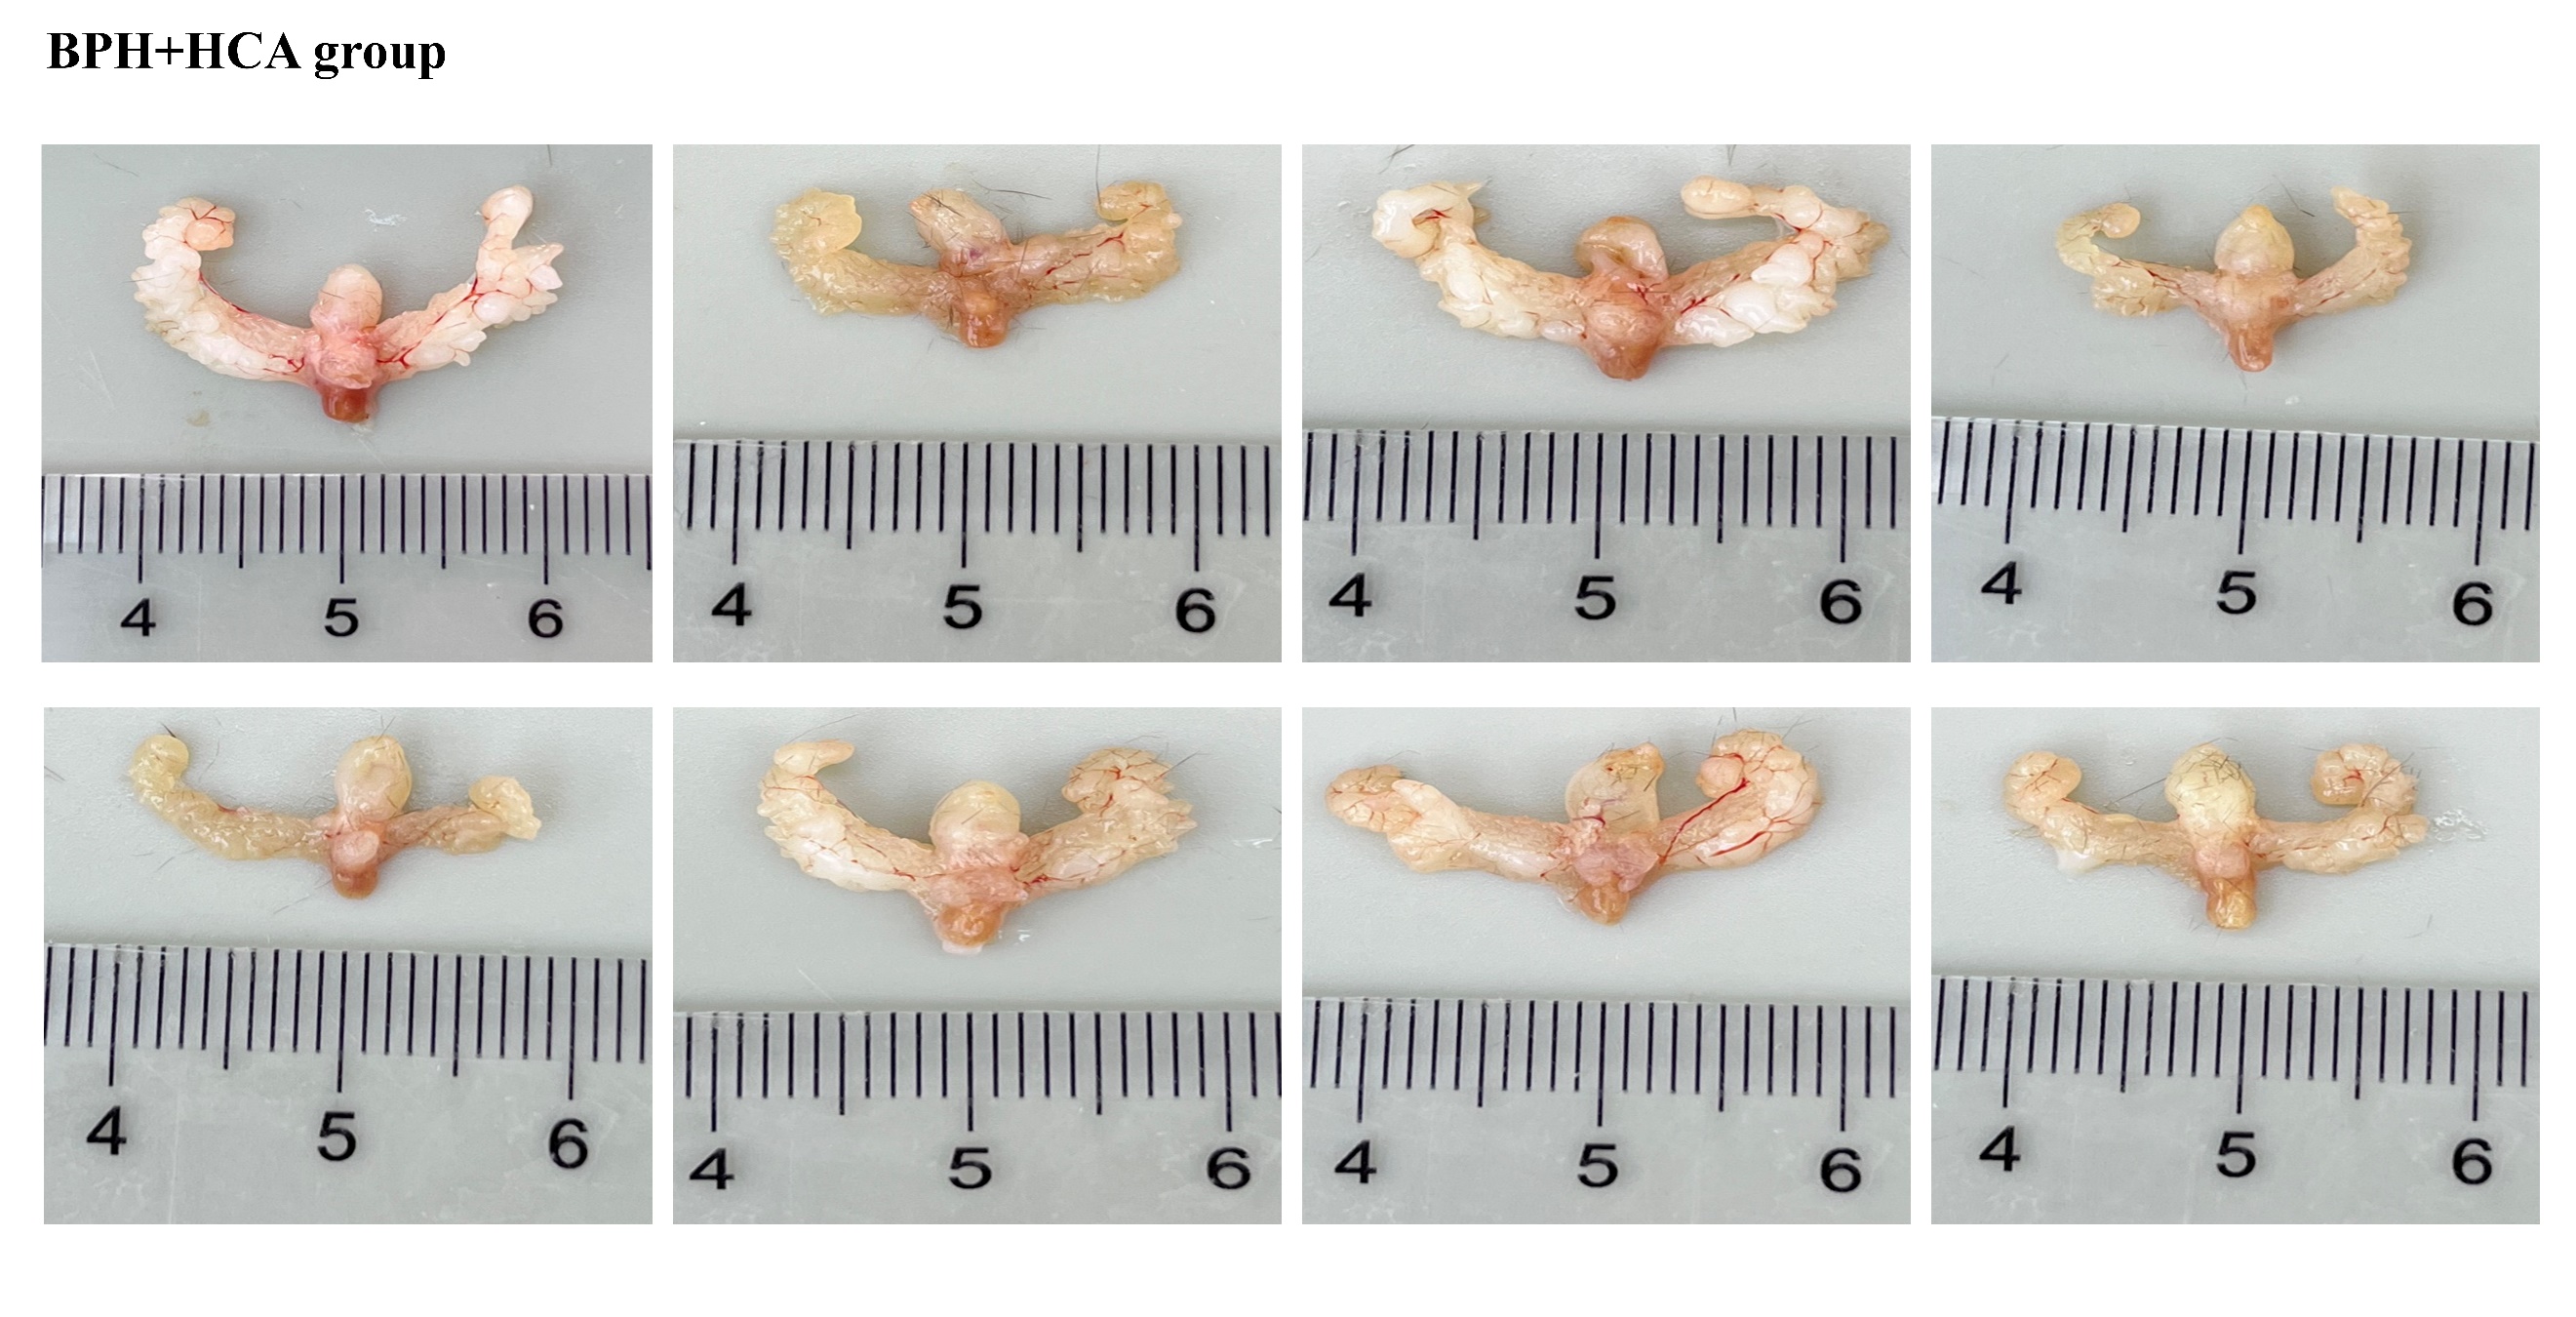 |

**The HE staining images of prostate tissues from different groups are shown below.**

| **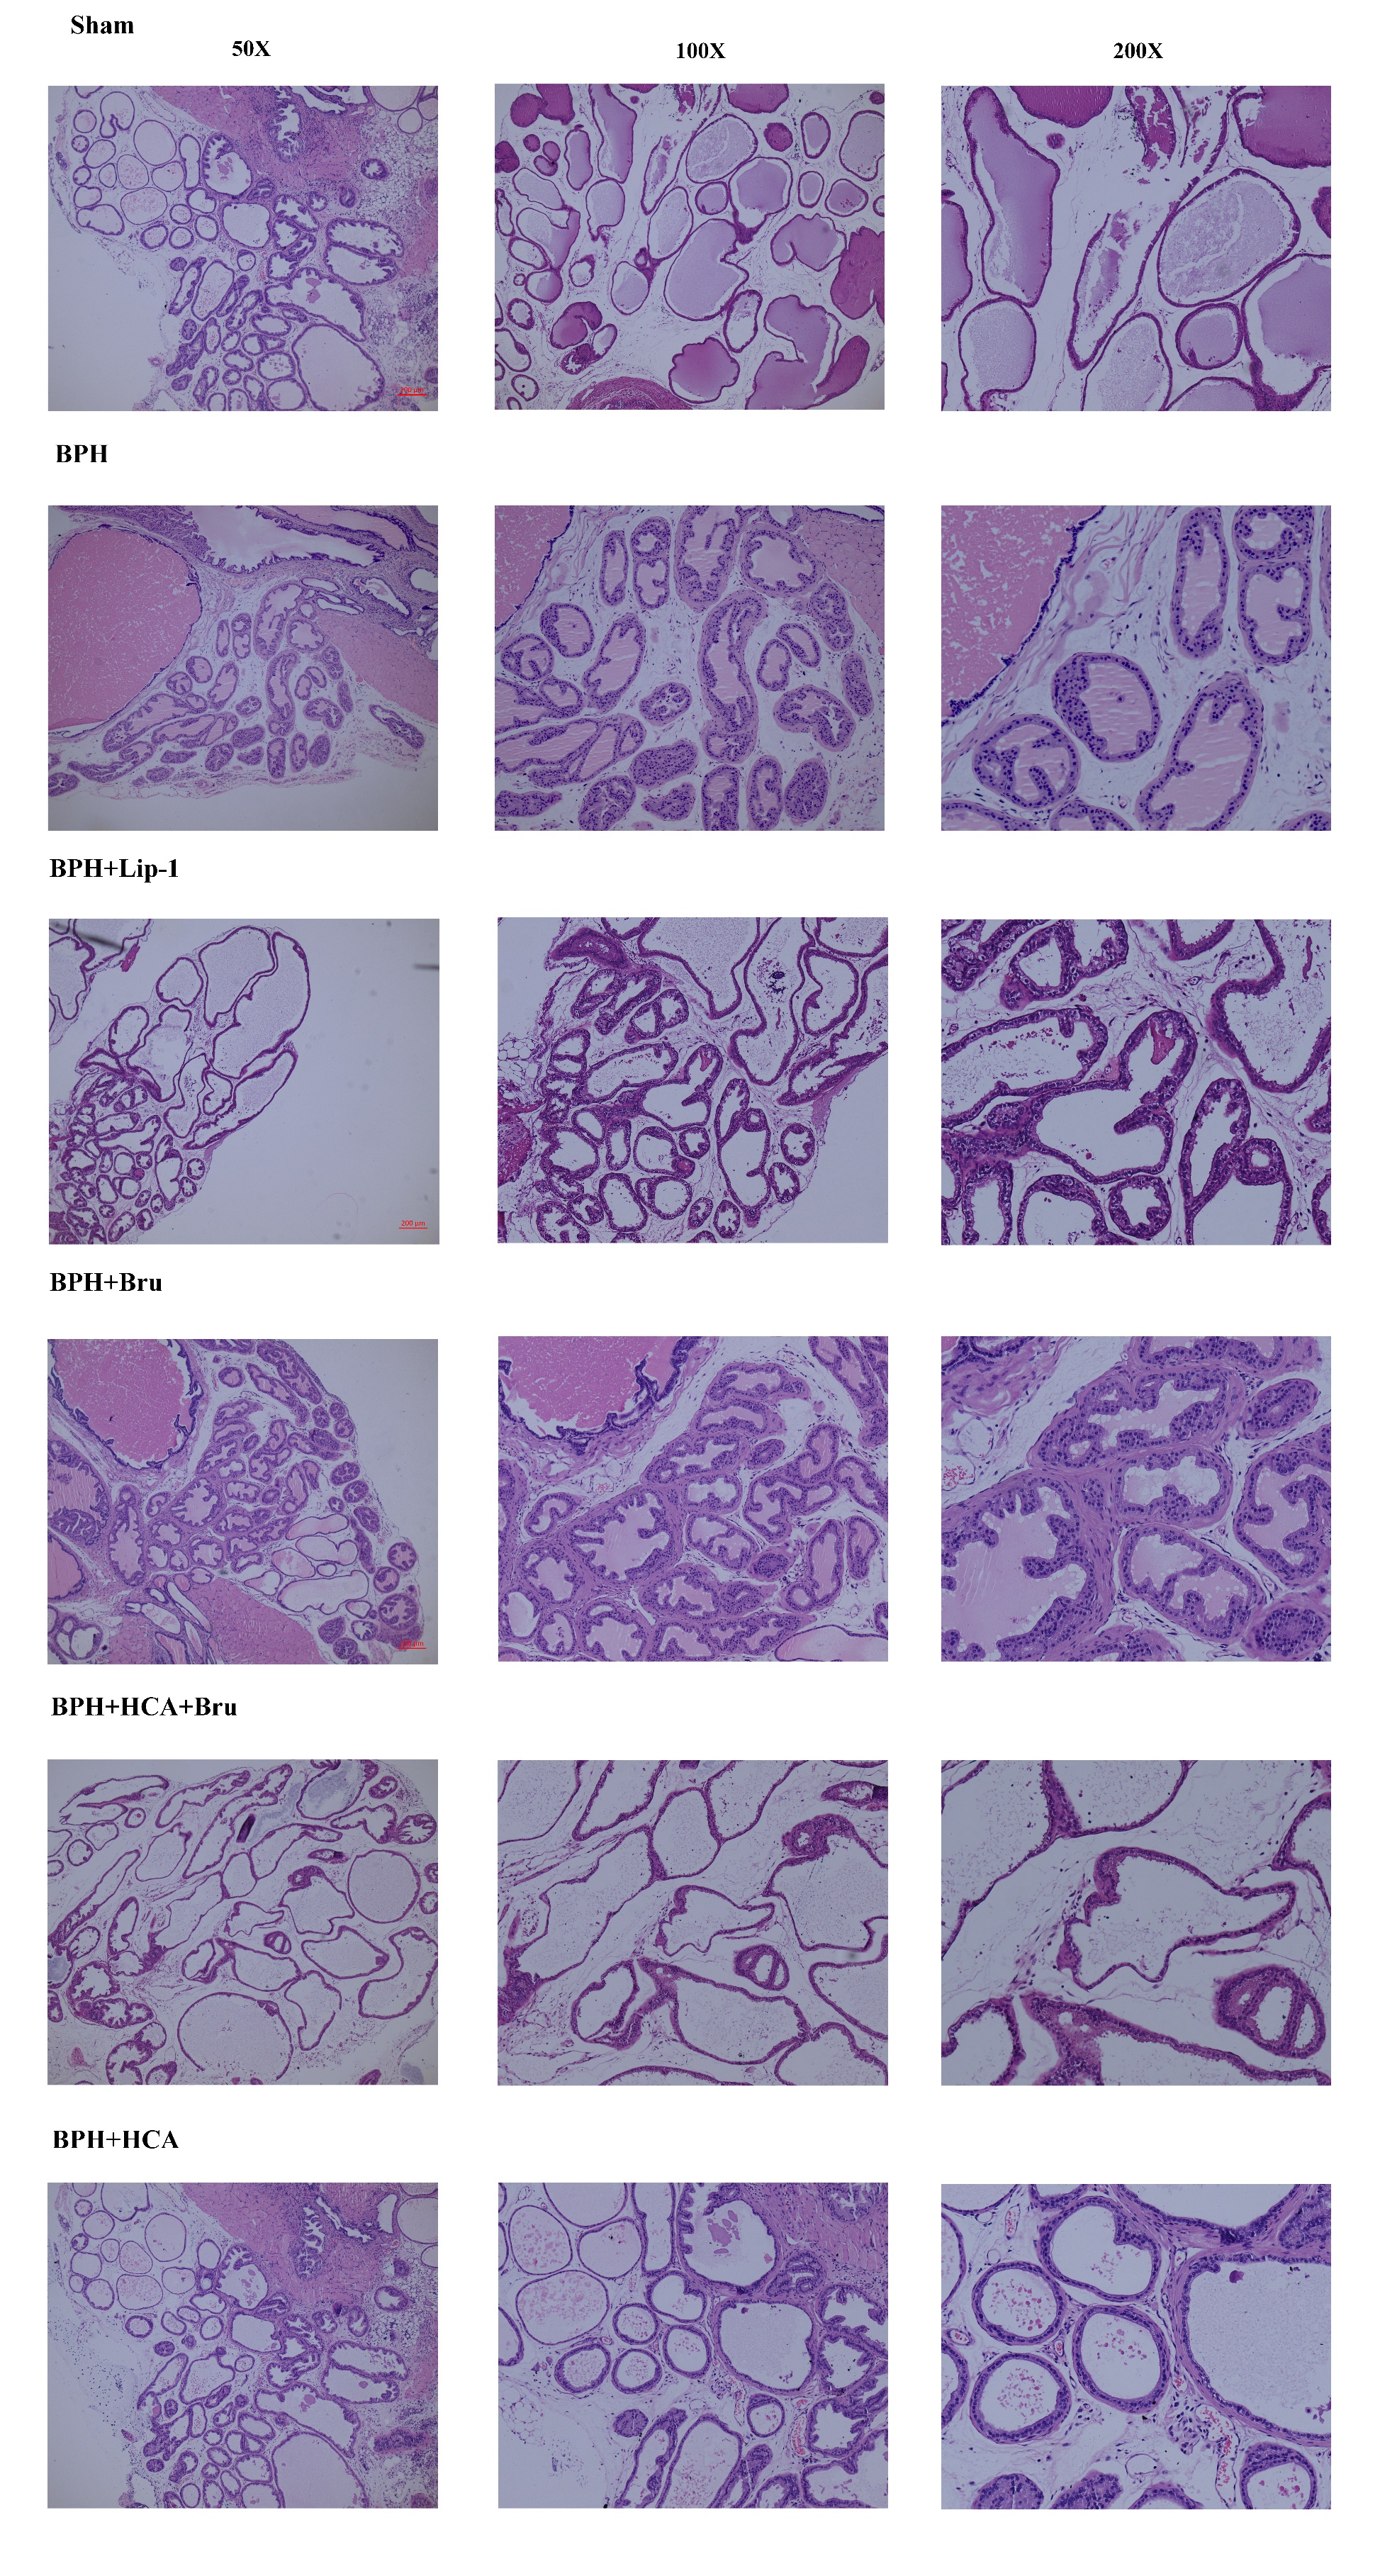** |
| --- |

**The TEM images of prostate tissues from the Sham group and the BPH group are shown below.**

| **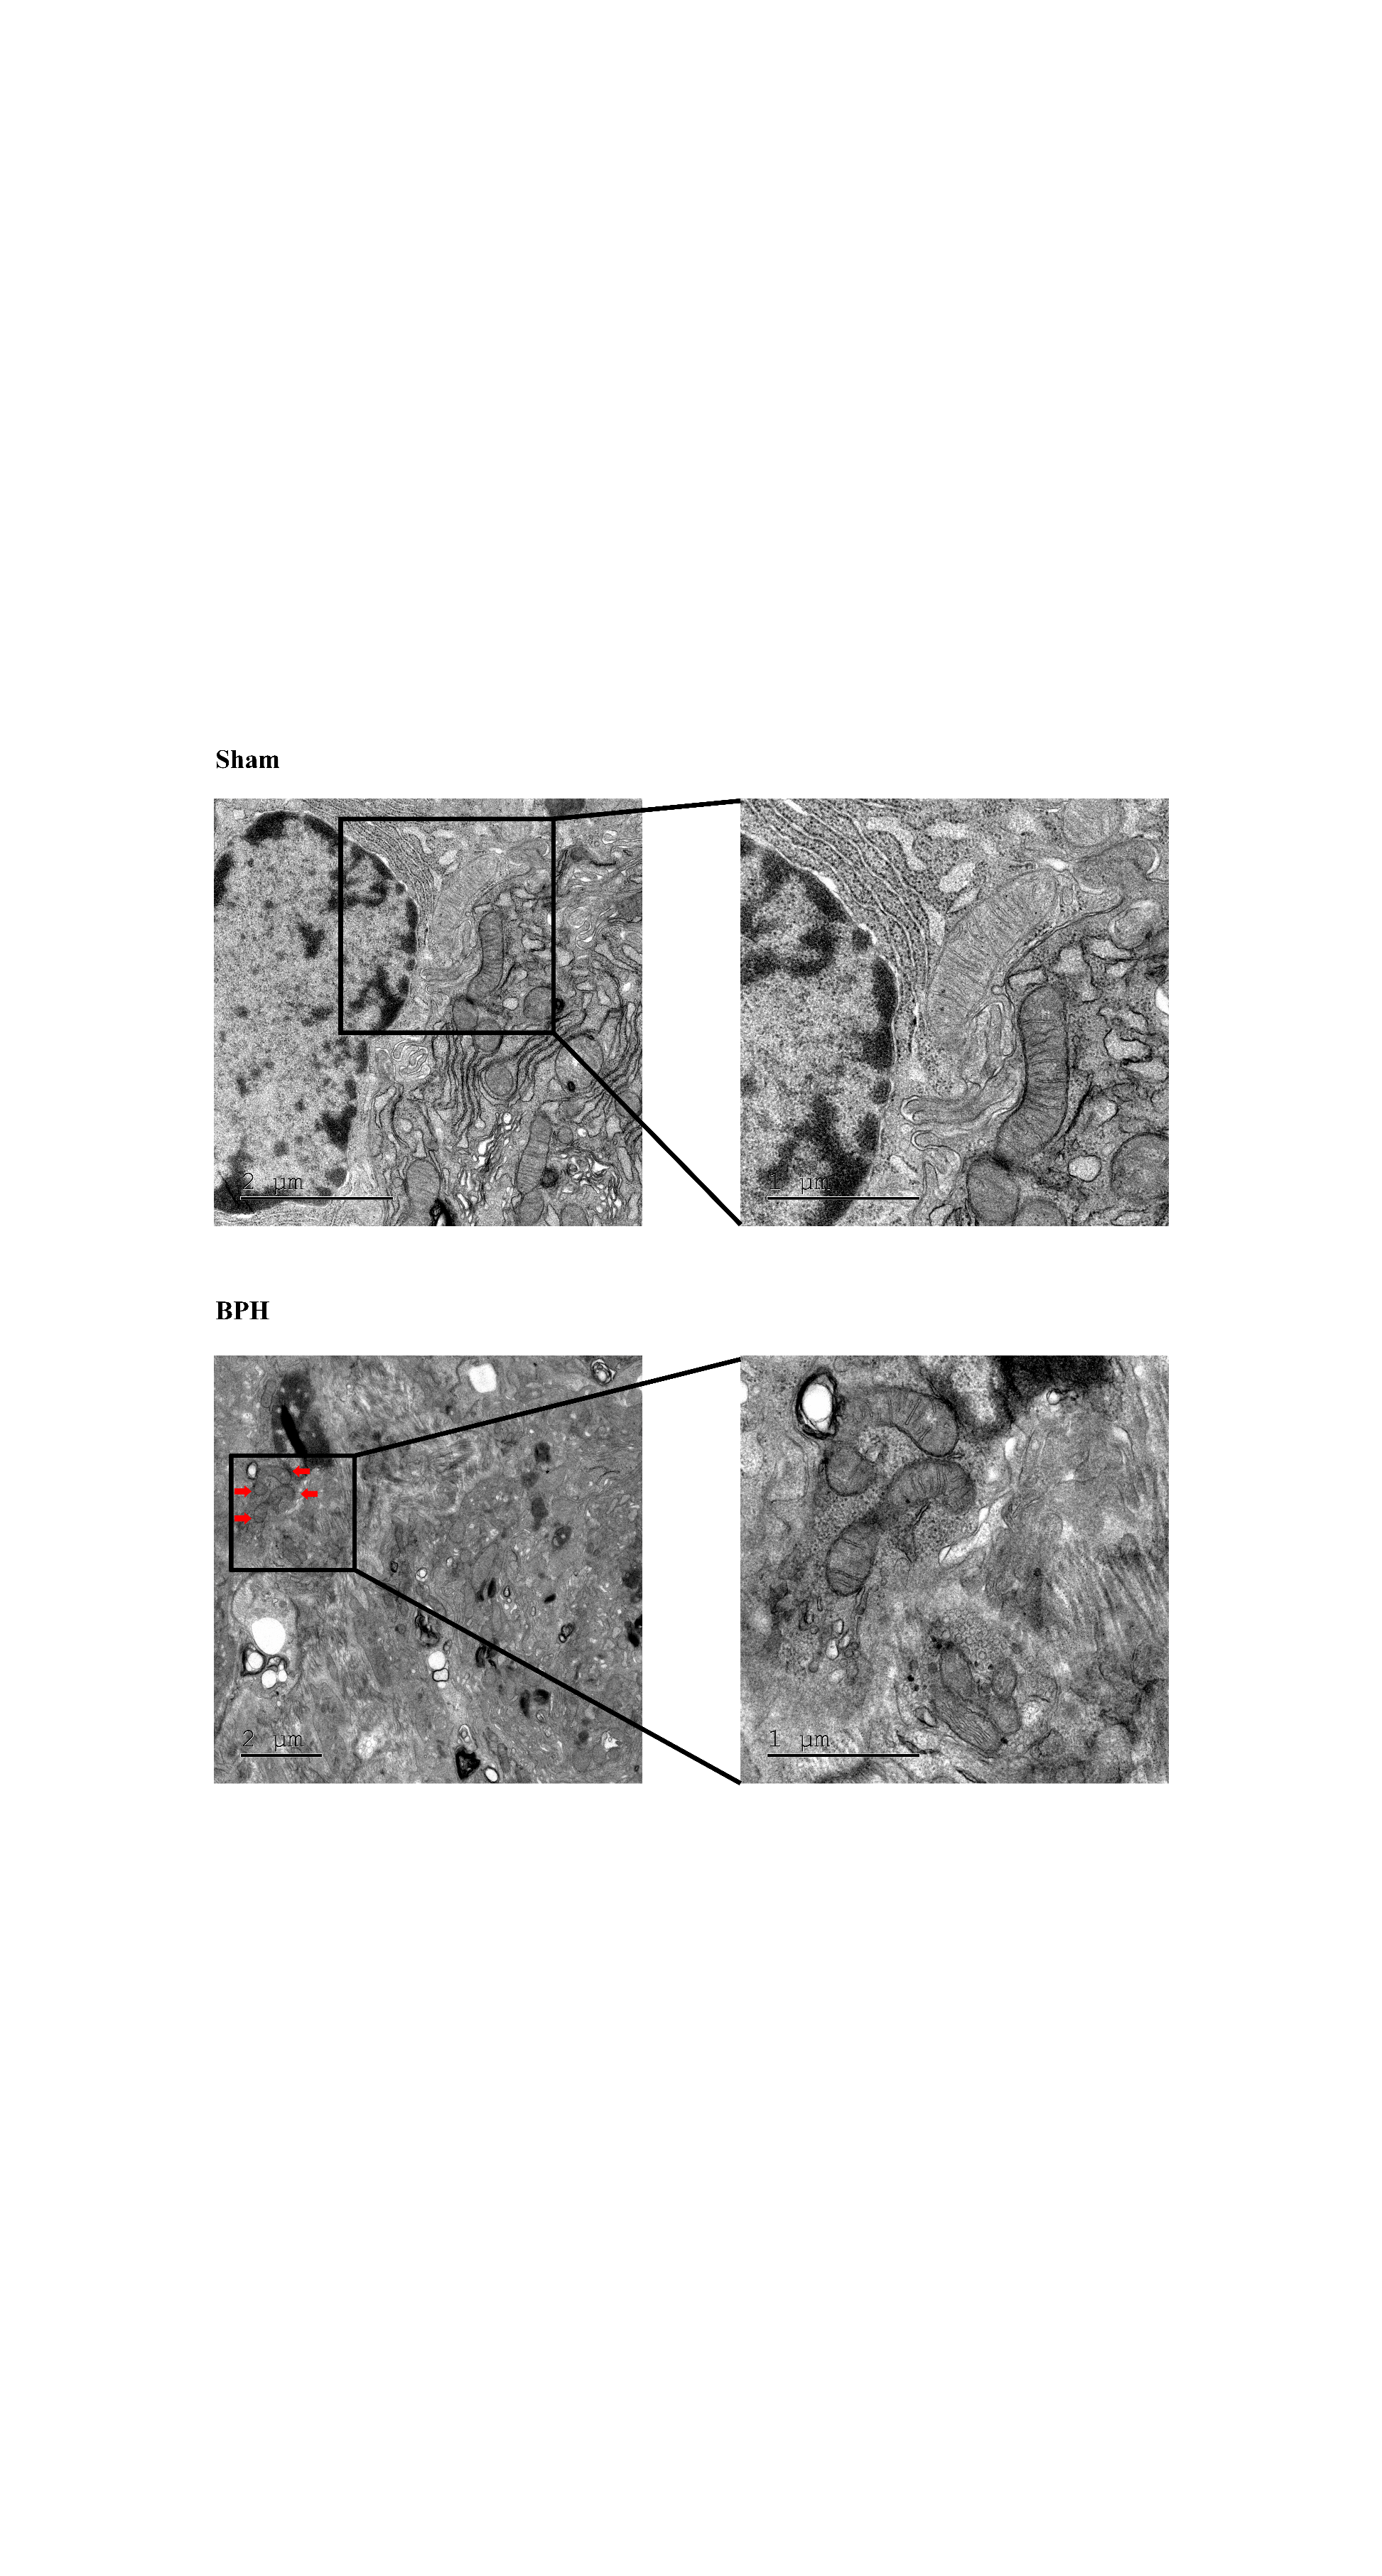** |
| --- |
